# Supplementary material for: Thirty-day mortality after elective and emergency total colectomy in Danish patients with inflammatory bowel disease: a population-based nationwide cohort study
Source: PubMed Central journal article supplement — BMJ Open. 2012 Apr 5;2(2):e000823. doi: 10.1136/bmjopen-2012-000823 (PMC3323813; doi:10.1136/bmjopen-2012-000823), 2012-04-05
Supplement: bmjopen-2012-000823-s2.pdf [file bmjopen-2012-000823-s2.pdf]

**Appendix Table 1.** Codes used in this study from the Danish National Registry of Patients.

International Classification of Diseases (ICD) codes:

Inflammatory Bowel Disease:

ICD-8: 563.01 (Crohn's disease); 563.19+569.04 (Ulcerative colitis)

ICD-10: K50 (Crohn's disease); K51 (Ulcerative colitis)

Clostridium difficile infection

ICD-10: A047

Surgical procedure codes (NOMESCO) and treatment codes:

Total colectomy:

KJFH

Reoperation:

KJW

TNF- $\alpha$  treatment and cyclosporine:

BOHJ18A and BOHJ20

**Appendix Table 2.** Definition of diseases included in the Charlson Comorbidity Index (International Classification of Diseases (ICD) codes).

|    | <b>Disease</b>                         | <b>ICD-8 codes</b>                                                   | <b>ICD-10 codes</b>                                                            | <b>Score</b> |
|----|----------------------------------------|----------------------------------------------------------------------|--------------------------------------------------------------------------------|--------------|
| 1  | Myocardial infarction                  | 410                                                                  | I21;I22;I23                                                                    | 1            |
| 2  | Congestive heart failure               | 427.09; 427.10; 427.11;<br>427.19; 428.99; 782.49                    | I50; I11.0; I13.0; I13.2                                                       | 1            |
| 3  | Peripheral vascular disease            | 440; 441; 442; 443; 444; 445                                         | I70; I71; I72; I73; I74; I77                                                   | 1            |
| 4  | Cerebrovascular disease                | 430-438                                                              | I60-I69; G45; G46                                                              | 1            |
| 5  | Dementia                               | 290.09-290.19; 293.09                                                | F00-F03; F05.1; G30                                                            | 1            |
| 6  | Chronic pulmonary disease              | 490-493; 515-518                                                     | J40-J47; J60-J67; J68.4; J70.1;<br>J70.3; J84.1; J92.0; J96.1; J98.2;<br>J98.3 | 1            |
| 7  | Connective tissue disease              | 712; 716; 734; 446; 135.99                                           | M05; M06; M08;<br>M09;M30;M31;<br>M32; M33; M34; M35; M36;<br>D86              | 1            |
| 8  | Ulcer disease                          | 530.91; 530.98; 531-534                                              | K22.1; K25-K28                                                                 | 1            |
| 9  | Mild liver disease                     | 571 57301 57304                                                      | B18; K70.0-K70.3; K70.9; K71;<br>K73; K74; K76.0                               | 1            |
| 10 | Diabetes type 1<br><br>Diabetes type 2 | 249.00; 249.06; 249.07; 249.09<br><br>250.00; 250.06; 250.07; 250.09 | E10.0, E10.1; E10.9<br><br>E11.0; E11.1; E11.9                                 | 1            |

|    |                                                         |                                                            |                                                       |   |
|----|---------------------------------------------------------|------------------------------------------------------------|-------------------------------------------------------|---|
| 11 | Hemiplegia                                              | 344                                                        | G81; G82                                              | 2 |
| 12 | Moderate to severe renal disease                        | 403; 404; 580-583; 584; 590.09; 593.19; 753.10-753.19; 792 | I12; I13; N00-N05; N07; N11; N14; N17-N19; Q61        | 2 |
| 13 | Diabetes with end-organ damage:<br>- type 1<br>- type 2 | 249.01-249.05; 249.08<br>250.01-250.05; 250.08             | E10.2-E10.8<br>E11.2-E11.8                            | 2 |
| 14 | Any tumor                                               | 140-194                                                    | C00-C75                                               | 2 |
| 15 | Leukemia                                                | 204-207                                                    | C91-C95                                               | 2 |
| 16 | Lymphoma                                                | 200-203; 275.59                                            | C81-C85; C88; C90; C96                                | 2 |
| 17 | Moderate/severe liver disease                           | 57300 07000 07002 07004<br>07006 07008 4560                | B15.0; B16.0; B16.2; B19.0;<br>K70.4; K72; K76.6; I85 | 3 |
| 18 | Metastatic solid tumor                                  | 195-198; 199                                               | C76-C80 C78.7)                                        | 6 |
| 19 | AIDS                                                    | 079.83                                                     | B21-B24                                               | 6 |
