# Supplementary material for: Thirty-day mortality after elective and emergency total colectomy in Danish patients with inflammatory bowel disease: a population-based nationwide cohort study
Source: PubMed Central journal article supplement — BMJ Open. 2012 Apr 5;2(2):e000823. doi: 10.1136/bmjopen-2012-000823 (PMC3323813; doi:10.1136/bmjopen-2012-000823), 2012-04-05
Supplement: bmjopen-2012-000823.draft_revisions.pdf [file bmjopen-2012-000823.draft_revisions.pdf]

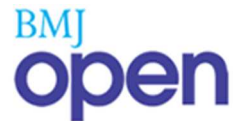

**Thirty-day mortality after elective and emergency total colectomy in Danish patients with inflammatory bowel disease:  
A population-based nationwide cohort study**

|                                 |                                                                                                                                                                                                                                                                                                                                                                                |
|---------------------------------|--------------------------------------------------------------------------------------------------------------------------------------------------------------------------------------------------------------------------------------------------------------------------------------------------------------------------------------------------------------------------------|
| Journal:                        | <i>BMJ Open</i>                                                                                                                                                                                                                                                                                                                                                                |
| Manuscript ID:                  | bmjopen-2012-000823                                                                                                                                                                                                                                                                                                                                                            |
| Article Type:                   | Research                                                                                                                                                                                                                                                                                                                                                                       |
| Date Submitted by the Author:   | 10-Jan-2012                                                                                                                                                                                                                                                                                                                                                                    |
| Complete List of Authors:       | Tøttrup, Anders; Aarhus University Hospital, Surgery P<br>Erichsen, Rune; Aarhus University Hospital, Department of Clinical Epidemiology<br>Sværke, Claus; Aarhus University Hospital, Department of Clinical Epidemiology<br>Laurberg, Søren; Aarhus University Hospital, Surgery P<br>Toft Srensen, Henrik; Aarhus University Hospital, Department of Clinical Epidemiology |
| <b>Primary Subject Heading</b>: | Gastroenterology and hepatology                                                                                                                                                                                                                                                                                                                                                |
| Secondary Subject Heading:      | Surgery                                                                                                                                                                                                                                                                                                                                                                        |
| Keywords:                       | Inflammatory bowel disease < GASTROENTEROLOGY, Colorectal surgery < SURGERY, EPIDEMIOLOGY                                                                                                                                                                                                                                                                                      |
|                                 |                                                                                                                                                                                                                                                                                                                                                                                |

SCHOLARONE™  
Manuscripts

only

1  
2  
3  
4 **Thirty-day mortality after elective and emergency total colectomy in Danish**  
5 **patients with inflammatory bowel disease:**  
6 **A population-based nationwide cohort study**  
7

8  
9 A. Tøttrup<sup>1</sup>, R. Erichsen<sup>2</sup>, C. Sværke<sup>2</sup>, S. Laurberg<sup>1</sup>, H.T. Sørensen<sup>2</sup>.  
10

11  
12 <sup>1</sup>Department of Surgery P, Aarhus University Hospital  
13

14 <sup>2</sup>Department of Clinical Epidemiology, Aarhus University Hospital  
15  
16

17  
18 Corresponding author: Dr. Anders Tøttrup, Department of Surgery P, Aarhus University  
19 Hospital, Tage Hansensgade, 8000 Aarhus C, Denmark. Mail: [andtoe@rm.dk](mailto:andtoe@rm.dk). Phone: +45  
20  
21 89497703. Fax: +45 89497549  
22  
23  
24

25  
26  
27  
28  
29 Keywords: Crohn's disease; Colectomy; Inflammatory bowel disease; Mortality; Ulcerative  
30 colitis; surgery  
31  
32  
33  
34  
35  
36  
37  
38  
39  
40  
41  
42  
43  
44  
45  
46  
47  
48  
49  
50  
51  
52  
53  
54  
55  
56  
57  
58  
59  
60

## Abstract

### Background

There is little population-based data available on postoperative mortality and potential prognostic factors in patients with inflammatory bowel disease (IBD), who undergo elective or emergency total colectomy. The purpose of our investigation was to assess 30-day mortality among Danish IBD patients and to examine the prognostic impact of hospital total colectomy volume, age, gender, and comorbidity.

### Methods

We compared 30-day survival over the 1996-2010 period among 2,889 IBD patients with total colectomy identified in the Danish National Registry of Patients. This registry covers all hospitals in Denmark. Postoperative survival patterns for patients with ulcerative colitis and Crohn's disease were compared, using proportional hazard regression. The regression model accounted for the timing of surgery, hospital total colectomy volume, age, gender, and comorbidity.

### Results

Among 2,889 IBD patients with total colectomy, 50% underwent surgery during an emergency hospitalization. Thirty-day mortality was 5.3% among emergency cases, compared to 1% among elective cases. The highest mortality (8.1%) was observed among Crohn's patients undergoing emergency surgery. The mortality of patients with ulcerative colitis undergoing emergency surgery was 5.2%. After elective surgery, the 30-day mortality was 0.9% among patients with ulcerative colitis and 1.5% among Crohn's disease patients. Low hospital total colectomy volume, comorbidity, and high age were associated with increased 30-day mortality in ulcerative colitis patients undergoing emergency surgery.

## Conclusion

Emergency total colectomy among patients with ulcerative colitis and particularly Crohn's disease is associated with substantial 30-day mortality.

## Significance of this study

### Article focus

- Elective and emergency total colectomy is commonly performed in inflammatory bowel disease
- Emergency operations are associated with higher mortality than elective procedures.

### Key messages

- IBD patients undergoing emergency total colectomy have a 30-day mortality of 5.3% as opposed to 1% after elective total colectomy.
- Low hospital volume, high age and comorbidity are associated with increased mortality in patients with ulcerative colitis undergoing emergency surgery.
- It is suggested to centralize treatment, and to aim for elective procedures in high risk patients.

### Strengths and limitations of this study

- The study covers complete national data on total colectomies performed for inflammatory disease.

1  
2  
3  
4  The unique ID number of all patients makes recording of all events highly  
5  
6 reliable.

7  
8  
9  
10  The main limitation is lack of access to specific clinical parameters  
11  
12  
13  
14  
15  
16  
17  
18  
19  
20  
21  
22  
23  
24  
25  
26  
27  
28  
29  
30  
31  
32  
33  
34  
35  
36  
37  
38  
39  
40  
41  
42  
43  
44  
45  
46  
47  
48  
49  
50  
51  
52  
53  
54  
55  
56  
57  
58  
59  
60

## Introduction

Inflammatory bowel diseases (IBD) cause serious morbidity and disability in people of all ages. Medical treatment remains the cornerstone for managing these diseases. Over the past two decades, use of immunosuppressants such as azathioprine (1;2) has increased significantly as a treatment modality. More recently, potent biological treatments have proved effective in treating both ulcerative colitis and Crohn's disease (3-7). Historical data have shown that up to 83% of patients with Crohn's disease underwent at least one bowel resection during a 10-year period (8), and up to 25% of patients with ulcerative colitis needed surgical treatment (9). While some recent studies show that modern medical treatment may decrease the need for surgery in IBD patients (10-12), others suggest that this is not the case (2;13).

In patients with severe ulcerative colitis, colectomy rates have remained stable over the past decades (14), although the introduction of biological rescue therapy is likely to decrease use of this surgical intervention in coming years (15;16). Mortality rates of up to 30% have been reported historically in patients undergoing emergency total colectomy for ulcerative colitis (17;18). Delay in patient referral for surgery has been proposed as the reason for high postoperative mortality (19). Although recent data from a highly specialized centre showed in-hospital mortality of less than 1% after emergency colectomy (20), population-based studies from the UK (21) and the US (22) have reported postoperative mortality as high as 5.4% – 5.7% after emergency colectomy. This contrasts with rates as low as 0.7% – 0.8 % after elective colectomy. Advanced age, comorbidity, delay of more than 6 days between hospital admission and colectomy, and low hospital volume have been associated with increased postoperative mortality after colectomy in IBD patients (22;23).

1  
2  
3  
4 In many countries, including Denmark, increasing specialization has occurred, with  
5  
6 more rare and complicated conditions treated at specialized centres. Still, severe IBD  
7  
8 continues to be treated at general district hospitals, where the number of patients is low  
9  
10 and outcome appears to be poor (24).  
11

12  
13  
14 The present study aimed to investigate 30-day mortality after elective and emergency  
15  
16 total colectomy in Danish IBD patients, with special emphasis on the prognostic impact  
17  
18 of hospital total colectomy volume, age, sex, and comorbidity.  
19  
20  
21  
22  
23  
24  
25  
26  
27  
28  
29  
30  
31  
32  
33  
34  
35  
36  
37  
38  
39  
40  
41  
42  
43  
44  
45  
46  
47  
48  
49  
50  
51  
52  
53  
54  
55  
56  
57  
58  
59  
60

## Material and methods

We conducted this follow-up study in the setting of the entire Danish population of 5.4 million people during the January 1, 1996 – December 31, 2010 period. The Danish National Health Service provides tax-funded medical care for all Danish residents.

### Data sources

The Danish National Registry of Patients (DNRP) contains data on all non-psychiatric hospitalizations in Denmark since 1977 and on hospital outpatient clinic contacts since 1995 (25). The DNRP records civil registration number, hospital code, department code, date and type of admission (emergency/elective), dates and codes of procedures, admission and discharge dates, selected medical therapies, and up to 20 discharge diagnoses, coded by physicians according to the International Classification of Diseases (ICD), eighth revision until the end of 1993 and 10<sup>th</sup> revision thereafter. It is mandatory that all surgical procedures are coded according to the Nordic Medico-Statistical Committee (NOMESCO) classification (26).

We linked individual-level data from the DNRP using the civil registration number, a unique 10-digit identifier assigned at birth to all Danish residents by the Civil Registration System (CRS) (27). The CRS also tracks vital status and the residence of all Danish citizens and is updated daily.

### Patients with IBD and total colectomy

Patients were enrolled in the study if they had a hospital registry diagnosis of IBD, with accompanying procedure codes for total colectomy. (See codes in Appendix Table 1). Hospitalizations were described as elective or emergency and patients were categorized as having Crohn's disease, ulcerative colitis, or as a mixed group if their records



1  
2  
3  
4 contained ICD codes for both Crohn's disease and ulcerative colitis. We also obtained  
5  
6 information on reoperation occurring within 30 days of the primary surgery, TNF- $\alpha$ -  
7  
8 inhibitor and cyclosporine treatment in the year prior to surgery, and *Clostridium*  
9  
10 *difficile* infections. (See codes in Appendix Table 1). We categories IBD patients according  
11  
12 to age at date of total colectomy (0-39, 40-59, and 60+ years), year of colectomy (1996-  
13  
14 2000, 2001-2005, and 2006-2010), and hospital total colectomy volume defined as  
15  
16 annual number of total colectomies performed on IBD patients by the surgical  
17  
18 department and categorised according to Kaplan et al (low: <3, medium: 3-12, high 12+)  
19  
20 (22)  
21  
22  
23  
24

25 We also extracted information from the DNRP on comorbidity, *i.e.*, diseases coexisting  
26  
27 with IBD. We summarized comorbidity status using the Charlson Comorbidity Index  
28  
29 (CCI) (28). The CCI's scoring system assigns between one and six points to a range of  
30  
31 diseases. Each patient's sum of points represents a measure of his or her comorbidity  
32  
33 burden. We placed our study patients into three groups according to their sum of points:  
34  
35 0 points ("no comorbidity"), 1 to 2 points ("low comorbidity"); and 3 or more points ("high  
36  
37 comorbidity") (28). We defined comorbid diseases according to the ICD-10 codes provided  
38  
39 by Quan *et al.* (29), matching ICD-8 codes to ICD-10 codes as closely as possible. (See  
40  
41 codes in Appendix Table 2).  
42  
43  
44

### 45 **Mortality data**

46  
47 We followed IBD patients who were acutely or electively hospitalized for a procedure of  
48  
49 total colectomy in the period 1996-2010, from the date of colectomy until death, 30 days  
50  
51 post-surgery, or December 31, 2010, whichever came first.  
52  
53  
54

### 55 **Statistical analysis**

1  
2  
3  
4 Our main outcome of interest was 30-day mortality, estimated as the number of deaths  
5 after total elective or emergency colectomy divided by the total number of IBD patients  
6 undergoing elective/emergency colectomy. We stratified our study sample by IBD type  
7  
8 and by the following covariates: gender, age at colectomy, year of colectomy, hospital  
9  
10 total colectomy volume (22), duration of hospitalization prior to surgery (< 8 days, ≥ 8  
11  
12 days), presence or absence of TNF- $\alpha$ -inhibitor or cyclosporine therapy in the year before  
13  
14 the total colectomy, reoperation, CCI score, and colectomy subtype. We calculated  
15  
16 differences in mortality and corresponding 95% confidence intervals (95% CI) between  
17  
18 patients undergoing emergency vs. elective surgery overall. We also calculated mortality  
19  
20 rates for ulcerative colitis patients by age and hospital total colectomy volume. In  
21  
22 addition, we used Cox proportional-hazards regression to estimate mortality rate ratios  
23  
24 (MRR) for each covariate, using the reference values shown in Table 4. MRRs were  
25  
26 adjusted for age (0-39, ≥ 40 years), gender, and CCI score (0 and ≥1 points) to evaluate  
27  
28 the independent prognostic effect of the covariates included in the model. (We lacked  
29  
30 statistical power to mutually adjust for all covariates). In a subsequent analysis, we  
31  
32 estimated the proportion of patients who underwent reoperation, as a secondary  
33  
34  
35  
36  
37  
38  
39  
40  
41  
42  
43  
44  
45  
46  
47  
48  
49  
50  
51  
52  
53  
54  
55  
56  
57  
58  
59  
60  
outcome.

## Results

### Descriptive data

In total, 2,889 IBD patients with total colectomy were identified from the DNRP for the January 1, 1996 - December 31, 2010 period. Of these, 1,439 (49.8%) underwent surgery during an emergency hospitalization (49% female). Characteristics of IBD patients by type of surgery (elective and emergency) are shown in Tables 1 and 2. The majority of patients had a total colectomy due to ulcerative colitis (64.7% for elective cases; 73.4% for emergency cases). Of the 1,450 elective cases (51.9% female), 718 (49.5%) were younger than 40 years, 438 (30.2%) were between ages 40 and 59, and the remaining 294 (20.3%) were  $\geq$  60 years old (Table 1). Of the 1,439 emergency cases 693 (48.2%) were younger than 40 years, 390 (27.1 %) were between ages 40 and 59, and the remaining 356 (24.7%) were  $\geq$  60 years old (Table 2). The majority of elective (69.9%) and emergency (65.1%) surgeries took place in high-volume hospitals with  $>12$  total colectomies/year (Tables 1 and 2). None of the patients included in the present study were coded for infection with *Clostridium difficile*.

Among all IBD patients, 1,075 (74.1%) of elective cases and 1,097 (76.2%) of emergency cases had a CCI score of 0, and 375 (25.9%) of elective cases and 342 (23.8%) of emergency cases had a score of 1 or higher. Comorbidity scores were distributed almost equally between the three IBD groups (Tables 1 and 2). Total colectomy with ileostomy was performed more often in emergency cases than in elective cases (81.2% vs. 54.6%). Proctocolectomy with ileostomy was carried out in 102 emergency cases (7.1%) and 261 elective cases (18%). Frequencies of procedures by type and disease groups are shown in Tables 1 and 2.

### Mortality

1  
2  
3  
4 Within 30 days following colectomy, 14 of the 1,450 patients who underwent elective  
5 surgery died (1.0%), while 76 of the 1,439 emergency patients (5.3%) died (mortality  
6 difference = 4.3%; 95% CI: 3.1%, - 5.6%). Among ulcerative colitis patients, mortality was  
7  
8 0.9% (8/938) in the elective group and 5.2% in the emergency group. Patients with  
9  
10 Crohn's disease undergoing emergency surgery had the highest 30-day mortality (11/136  
11  
12 = 8.1%).  
13  
14  
15

16  
17  
18 Mortality was low in ulcerative colitis patients aged under 40 (0.2%, Table 3), both for  
19  
20 elective and emergency surgery. For patients aged 60 years or older, mortality increased  
21  
22 to 3.3% for those undergoing colectomy on an elective basis and to 18.4% for those  
23  
24 undergoing this procedure on an emergency basis (mortality difference = 15.1%; 95% CI:  
25  
26 9.8%, 20.3%). Mortality was lowest in high-volume hospitals (0.5% for elective and 3.6%  
27  
28 for emergency cases [mortality difference = 3.1%; 95% CI: 1.6%, 4.6%], Table 3). Patients  
29  
30 with high CCI scores also had high mortality. Table 3 shows mortality according to  
31  
32 duration of hospitalization prior to colectomy, colectomy type, and time period. Numbers  
33  
34 of outcomes in patients with Crohn's disease or mixed Crohn's disease/ulcerative colitis  
35  
36 were too small to permit more detailed analysis of mortality.  
37  
38  
39

40  
41 In a subsequent analysis we found that reoperation within 30 days occurred in 115  
42  
43 (7.9%) elective cases and in 140 (9.7%) emergency cases and was associated with  
44  
45 particularly high mortality.  
46  
47  
48

#### 49 **Prognostic factors in patients with ulcerative colitis.**

50  
51 Crude and adjusted MRRs for patients with ulcerative colitis are shown in Table 4.  
52  
53 Higher age at operation ( $\geq 40$  years) was associated with major increases in MRRs in both  
54  
55 emergency and elective cases. A CCI score  $\geq 1$  was associated with an increased MRR  
56  
57  
58  
59  
60

1  
2  
3  
4 after emergency colectomy, but had no influence on MRR in patients undergoing elective  
5  
6 colectomy. MRRs were lower for cases undergoing surgery at high-volume hospitals  
7  
8 compared with low-volume hospitals. In the regression model for emergency colectomies,  
9  
10 gender, duration of hospitalization before colectomy, and time period were not clearly  
11  
12 associated with mortality. In the regression model for elective colectomies, hospitalization  
13  
14 for 8 days or more prior to surgery was associated with an increased MRR. Numbers  
15  
16 were too low to permit calculation of MRRs for patients with Crohn's disease or with both  
17  
18 ulcerative colitis and Crohn's disease.  
19  
20  
21  
22  
23  
24  
25  
26  
27  
28  
29  
30  
31  
32  
33  
34  
35  
36  
37  
38  
39  
40  
41  
42  
43  
44  
45  
46  
47  
48  
49  
50  
51  
52  
53  
54  
55  
56  
57  
58  
59  
60

## Discussion

Our study showed that 30-day postoperative mortality after total colectomy was 5.3% for IBD patients undergoing surgery on an emergency basis and 1 % for those with elective procedures. We also found that comorbidity, surgery in a hospital performing few annual colectomies, and age over 40 were associated with increased mortality after emergency total colectomy in patients with ulcerative colitis. Age over 40 and hospitalization for 8 days or more prior to colectomy were associated with increased mortality in ulcerative colitis patients undergoing elective total colectomy.

Our data extend previous research with recent population based data. Mortality after emergency total colectomy for ulcerative colitis was as high as 27% (19;30-32) in the past. More recent data from tertiary referral centres indicates in-hospital mortality of less than 0.6% (20;33;34). However, a short report on a small number of patients treated at a district general hospital in the UK raised concerns that mortality remains considerably higher than estimates based on tertiary centres (24). This was confirmed in a record linkage study conducted in England for the 1998-2000 period by Roberts *et al.* In that study, 30-day mortality was 0.8% following elective colectomy and 5.7% following emergency colectomy in ulcerative colitis patients (21). A later study by Kaplan *et al.*, based on the American Nationwide Inpatient Sample database, reported similar figures of 0.7% and 5.4% for in-hospital mortality following elective and emergency colectomy, respectively, in ulcerative colitis patients (22). This large-scale American study, covering approximately 20% of Veterans' Administration admissions, identified low hospital volume for colectomies, age over 40, comorbidity, and hospitalization for more than 7 days prior to colectomy as independent prognostic factors. Our study supports these previous population-based investigations, showing that 30-day postoperative mortality after total colectomy is probably not as low as suggested by reports from tertiary referral

1  
2  
3  
4 centres. In addition, both the American study and our study underscore that a high  
5  
6 volume of these surgeries – and consequently a high degree of experience – may be  
7  
8 important in reducing postoperative mortality after both emergency and elective total  
9  
10 colectomy in IBD patients (35).

11  
12  
13  
14 Our finding of 8.1% 30-day mortality after emergency surgery in Crohn's disease patients  
15  
16 contrasts with the Roberts *et al.* (21) study, which found a 30-day mortality of only 2.9%.  
17  
18 The main reason for this difference may be that we included only patients with total  
19  
20 colectomy, while Roberts *et al.* included patients undergoing all types of colectomy,  
21  
22 including right hemicolectomy.  
23

24  
25  
26  
27 The high mortality observed in our study calls for a critical revision of indications for  
28  
29 elective and emergency colectomy in patients with Crohn's colitis. A key recommendation  
30  
31 is to treat patients with severe ulcerative colitis in highly specialized centres. Similar  
32  
33 recommendations could be made for patients with Crohn's disease, although the number  
34  
35 of patients included in the present study was too low to provide statistical support.  
36

37  
38  
39 Our study also confirmed that older age, emergency procedures, and a high degree of  
40  
41 comorbidity are associated with increased mortality after intestinal surgery  
42  
43 (22;23;36;37). In addition, it is known from population-based studies that hospitalization  
44  
45 for ulcerative colitis has a two-peak age incidence in a number of countries including  
46  
47 Denmark (38). We found that a high proportion of patients with ulcerative colitis  
48  
49 underwent total colectomy after age 60. An elective procedure performed earlier in life  
50  
51 would most likely reduce mortality in these patients. Interestingly, comorbidity had no  
52  
53 influence on MRRs among patients undergoing elective surgery. This suggests that  
54  
55  
56  
57  
58  
59  
60

1  
2  
3  
4 interventions to address comorbidities such as elevated blood pressure, arrhythmias,  
5  
6 and diabetes may have taken place preoperatively, ensuring a safer postoperative course.  
7  
8  
9

10 When medical treatment cannot achieve remission, delaying surgery can increase  
11 morbidity and mortality (19;39). Thus Kaplan *et al* (22) reported more than a doubling of  
12 the MRR among patients who were hospitalized (and presumably treated medically) for  
13 more than 7 days prior to surgery. Our study confirmed these findings for the subgroup  
14 undergoing elective surgery. Our study confirmed these findings for the subgroup  
15  
16  
17  
18  
19

20  
21  
22 The main strength of the present study is its nationwide population-based design in the  
23 setting of a free tax-supported healthcare system with complete information on follow-up.  
24 Moreover, we used a validated approach to identify IBD patients undergoing surgery (40).  
25  
26  
27 These features ensure generalizability of our results and minimize selection bias. In  
28 addition, we were able to adjust for a number of important covariates, including  
29 comorbidity, for which we had high-quality data (41).  
30  
31  
32  
33  
34  
35  
36

37 Our study also had several limitations. Although we used a validated approach to  
38 identify colectomized IBD patients, approximately 16% had codes corresponding to both  
39 Crohn's disease and ulcerative colitis. This likely reflected some degree of coding error.  
40 We therefore grouped IBD patients with mixed codes separately to minimize  
41 misclassification of the Crohn's and ulcerative colitis groups. We also did not have access  
42 to important clinical parameters, such as reasons for deciding to proceed with surgery or  
43 to discontinue medical treatment. Thus we were unable to investigate the role of these  
44 important issues in relation to postoperative mortality.  
45  
46  
47  
48  
49  
50  
51  
52  
53  
54  
55  
56  
57  
58  
59  
60



1  
2  
3  
4 In conclusion, we observed high 30-day mortality among IBD patients undergoing  
5 emergency total colectomy. Among patients with ulcerative colitis, 30-day mortality was  
6 5.2% after total emergency colectomy, and among patients with Crohn's disease, it was  
7 8.1%. Low hospital volume of colectomy, comorbidity, and age over 40 were important  
8 prognostic factors.  
9  
10  
11  
12  
13  
14  
15  
16  
17  
18  
19  
20  
21  
22  
23  
24  
25  
26  
27  
28  
29  
30  
31  
32  
33  
34  
35  
36  
37  
38  
39  
40  
41  
42  
43  
44  
45  
46  
47  
48  
49  
50  
51  
52  
53  
54  
55  
56  
57  
58  
59  
60

Table 1: Characteristics of patients with an inflammatory bowel disease (IBD) diagnosis undergoing elective total colectomy in the period 1996-2010 in Denmark.

|                                                                           |                                         | Ulcerative colitis | Crohn's disease | Ulcerative colitis and Crohn's disease* |              |
|---------------------------------------------------------------------------|-----------------------------------------|--------------------|-----------------|-----------------------------------------|--------------|
| Total number (n=1450)                                                     |                                         | 938 (64.7 %)       | 201 (13.9 %)    | 311 (21.4 %)                            |              |
| Males                                                                     |                                         | 485 (51.7%)        | 76 (37.8 %)     | 137 (44.1 %)                            |              |
| Females                                                                   |                                         | 453 (48.3 %)       | 125 (62.2 %)    | 174 (55.9 %)                            |              |
| Age at operation:                                                         |                                         |                    |                 |                                         |              |
|                                                                           | 0-39 years                              | 436 (46.5 %)       | 121 (60.2 %)    | 161 (51.8 %)                            |              |
|                                                                           | 40-59 years                             | 292 (31.1 %)       | 55 (27.4 %)     | 91 (29.3 %)                             |              |
|                                                                           | ≥ 60 years                              | 210 (22.4 %)       | 25 (12.4 %)     | 59 (19.0 %)                             |              |
| Number of annual colectomies for IBD performed in the surgical department |                                         |                    |                 |                                         |              |
|                                                                           | ≤3/year                                 | 131 (14.0 %)       | 22 (11.0 %)     | 45 (14.5 %)                             |              |
|                                                                           | 3-12/year                               | 166 (17.7 %)       | 28 (13.9 %)     | 44 (14.1 %)                             |              |
|                                                                           | >12/year                                | 641 (68.3 %)       | 151 (75.1 %)    | 222 (71.4%)                             |              |
| Duration of hospitalization before colectomy                              |                                         |                    |                 |                                         |              |
|                                                                           | Admitted < 8 days before colectomy      | 557 (59.4 %)       | 136 (67.7 %)    | 178 (57.2 %)                            |              |
|                                                                           | Admitted ≥ 8 days before colectomy      | 381 (40.6 %)       | 65 (32.3 %)     | 133 (42.8 %)                            |              |
| Medical treatment within one year before colectomy                        |                                         |                    |                 |                                         |              |
|                                                                           | TNF-α and Cyclosporine                  | 64 (6.8 %)         | 10 (5.0 %)      | 37 (11.9 %)                             |              |
| Reoperation within 30 days postoperatively                                |                                         | 73 (7.8 %)         | 21 (10.4 %)     | 21 (6.8 %)                              |              |
| Charlson Comorbidity Index Score                                          |                                         |                    |                 |                                         |              |
|                                                                           | 0                                       | 705 (75.2 %)       | 146 (72.6 %)    | 224 (72.0 %)                            |              |
|                                                                           | 1-2                                     | 194 (20.7 %)       | 45 (22.4 %)     | 69 (22.2 %)                             |              |
|                                                                           | ≥3                                      | 39 (4.2 %)         | 10 (5.0 %)      | 18 (5.8 %)                              |              |
| Colectomy type                                                            |                                         |                    |                 |                                         |              |
|                                                                           | Colectomy with ileorectal anastomosis   | KJFH00 - 01        | 54 (5.8 %)      | 42 (20.9 %)                             | 39 (12.5 %)  |
|                                                                           | Colectomy with ileostomy                | KJFH10 - 11        | 523 (55.8 %)    | 99 (49.3 %)                             | 170 (54.7 %) |
|                                                                           | Proctocolectomy with ileostomy          | KJFH20 - 21        | 147 (15.7 %)    | 49 (24.4 %)                             | 65 (20.9 %)  |
|                                                                           | Restorative proctocolectomy ± ileostomy | KJFH30 - 33        | 197 (21.0 %)    | 5 (2.5 %)                               | 28 (9.0 %)   |
|                                                                           | Proctocolectomy with Koch reservoir     | KJFH40             | 1 (0.1 %)       | 0 (0 %)                                 | 0 (0 %)      |
|                                                                           | Other form of colectomy                 | KJFH96             | 16 (1.7 %)      | 6 (3.0 %)                               | 9 (2.9 %)    |
| Time period                                                               |                                         |                    |                 |                                         |              |
|                                                                           | 1996-2000                               | 307 (32.7 %)       | 67 (33.3 %)     | 114 (36.7 %)                            |              |
|                                                                           | 2001-2005                               | 343 (36.6 %)       | 78 (38.8 %)     | 95 (30.6 %)                             |              |
|                                                                           | 2006-2010                               | 288 (30.7 %)       | 56 (27.9 %)     | 102 (32.8 %)                            |              |

\* Patients for who codes for both ulcerative colitis and Crohn's disease were used at any preceding or subsequent admission or hospital contact.

Table 2: Characteristics of patients with an inflammatory bowel disease (IBD) diagnosis undergoing emergency total colectomy in the period 1996-2010 in Denmark.

|                                                                           |                                         | Ulcerative colitis | Crohn's disease | Ulcerative colitis and Crohn's disease* |              |
|---------------------------------------------------------------------------|-----------------------------------------|--------------------|-----------------|-----------------------------------------|--------------|
| Total number (n=1,439)                                                    |                                         | 1056 (73.4 %)      | 136 (9.5 %)     | 247 (17.2%)                             |              |
| Males                                                                     |                                         | 559 (52.9 %)       | 62 (45.6 %)     | 113 (45.7 %)                            |              |
| Females                                                                   |                                         | 497 (47.1 %)       | 74 (54.4 %)     | 134 (54.3 %)                            |              |
| Age at operation:                                                         |                                         |                    |                 |                                         |              |
|                                                                           | 0-39 years                              | 503 (47.6 %)       | 56 (41.2 %)     | 134 (54.3 %)                            |              |
|                                                                           | 40-59 years                             | 286 (27.1 %)       | 39 (28.7 %)     | 65 (26.3 %)                             |              |
|                                                                           | ≥ 60 years                              | 267 (25.3 %)       | 41 (30.1 %)     | 48 (19.4 %)                             |              |
| Number of annual colectomies for IBD performed in the surgical department |                                         |                    |                 |                                         |              |
|                                                                           | ≤3/year                                 | 168 (15.9 %)       | 31 (22.8 %)     | 43 (17.4 %)                             |              |
|                                                                           | 3-12/year                               | 186 (17.6 %)       | 24 (17.6 %)     | 50 (20.2 %)                             |              |
|                                                                           | >12/year                                | 702 (66.5 %)       | 81 (59.6 %)     | 154 (62.4%)                             |              |
| Duration of hospitalization before colectomy                              |                                         |                    |                 |                                         |              |
|                                                                           | Admitted < 8 days before colectomy      | 296 (28.0 %)       | 45 (33.1 %)     | 85 (34.4 %)                             |              |
|                                                                           | Admitted ≥ 8 days before colectomy      | 760 (72.0 %)       | 91 (66.9 %)     | 162 (65.6 %)                            |              |
| Medical treatment within one year before colectomy                        |                                         |                    |                 |                                         |              |
|                                                                           | TNF-α and cyclosporine                  | 67 (6.3 %)         | 12 (8.8 %)      | 23 (9.3 %)                              |              |
| Reoperation within 30 days postoperatively                                |                                         | 102 (9.7 %)        | 11 (8.2 %)      | 27 (10.9 %)                             |              |
| Charlson Comorbidity Index score                                          |                                         |                    |                 |                                         |              |
|                                                                           | 0                                       | 810 (76.7 %)       | 96 (70.6 %)     | 191 (77.3 %)                            |              |
|                                                                           | 1-2                                     | 194 (18.4 %)       | 30 (22.1 %)     | 49 (19.8 %)                             |              |
|                                                                           | ≥3                                      | 52 (4.9 %)         | 10 (7.3 %)      | 7(2.8 %)                                |              |
| Colectomy type                                                            |                                         |                    |                 |                                         |              |
|                                                                           | Colectomy with ileorectal anastomosis   | KJFH00 - 01        | 38 (3.6 %)      | 16 (11.8 %)                             | 19 (7.7 %)   |
|                                                                           | Colectomy with ileostomy                | KJFH10 - 11        | 875 (82.9 %)    | 97 (71.3 %)                             | 196 (74.4 %) |
|                                                                           | Proctocolectomy with ileostomy          | KJFH20 - 21        | 73 (6.9 %)      | 8 (5.9 %)                               | 21 (8.5 %)   |
|                                                                           | Restorative proctocolectomy ± ileostomy | KJFH30 - 33        | 31 (2.9 %)      | 2 (1.5 %)                               | 4 (1.6 %)    |
|                                                                           | Proctocolectomy with Koch reservoir     | KJFH40             | 1 (0.1 %)       | 0 (0 %)                                 | 0 (0 %)      |
|                                                                           | Other form of colectomy                 | KJFH96             | 38 (3.6 %)      | 13 (9.6 %)                              | 7 (2.8 %)    |
| Time period                                                               |                                         |                    |                 |                                         |              |
|                                                                           | 1996-2000                               | 371 (35.1 %)       | 54 (39.7 %)     | 90 (36.4 %)                             |              |
|                                                                           | 2001-2005                               | 385 (36.5 %)       | 36 (7.1 %)      | 84 (34.0 %)                             |              |
|                                                                           | 2006-2010                               | 300 (28.4 %)       | 46 (11.0 %)     | 73 (30.0 %)                             |              |

\* Patients for who codes for both ulcerative colitis and Crohn's disease were used at any preceding or subsequent admission or hospital contact.

1  
2  
3  
4

Table 3. Thirty-day mortality (in percent) in patients with an inflammatory bowel disease (IBD) diagnosis undergoing total colectomy in the period 1996-2010 in Denmark, by emergency vs. elective surgery.

7

|                                                                           |  | Ulcerative colitis |              | Crohn's disease |             | Ulcerative colitis and Crohn's disease* |             |
|---------------------------------------------------------------------------|--|--------------------|--------------|-----------------|-------------|-----------------------------------------|-------------|
|                                                                           |  | Emergency          | Elective     | Emergency       | Elective    | Emergency                               | Elective    |
| All                                                                       |  | 5.2 (55/1056)      | 0.9 (8/938)  | 8.1 (11/136)    | 1.5 (3/201) | 4.0 (10/247)                            | 1.0 (3/311) |
| Males                                                                     |  | 5.8 (31/559)       | 0.8 (4/485)  | 6.5 (4/62)      | 2.6 (2/76)  | 2.7 (3/113)                             | 0.7 (1/137) |
| Females                                                                   |  | 5.2 (24/497)       | 0.9 (4/453)  | 9.5 (7/74)      | 0.8 (1/125) | 5.2 (7/134)                             | 1.1 (2/174) |
| Age at operation:                                                         |  |                    |              |                 |             |                                         |             |
| 0-39 years                                                                |  | 0.2 (1/503)        | 0.2 (1/436)  | 0 (0/56)        | 0 (0/121)   | 0 (0/134)                               | 0 (0/161)   |
| 40-59 years                                                               |  | 1.7 (5/286)        | 0.0 (0/292)  | 5.1 (2/39)      | 0 (0/55)    | 3.1 (2/65)                              | 1.1 (1/91)  |
| ≥ 60 years                                                                |  | 18.4 (49/267)      | 3.3 (7/210)  | 22.0 (9/41)     | 12 (3/25)   | 16.7 (8/48)                             | 3.4 (2/59)  |
| Number of annual colectomies for IBD performed by the surgical department |  |                    |              |                 |             |                                         |             |
| ≤3/year                                                                   |  | 11.3 (19/168)      | 1.5 (2/131)  | 22.6 (7/31)     | 4.5 (1/22)  | 4.7 (2/43)                              | 0 (0/45)    |
| 3-12/year                                                                 |  | 5.9 (11/186)       | 1.8 (3/166)  | 8.3 (2/24)      | 0 (0/28)    | 4.0 (2/50)                              | 0 (0/44)    |
| >12/year                                                                  |  | 3.6 (25/702)       | 0.5 (3/641)  | 2.5 (2/81)      | 1.3 (2/151) | 3.9 (6/154)                             | 1.4 (3/222) |
| Duration of hospitalization before colectomy                              |  |                    |              |                 |             |                                         |             |
| Admitted < 8 days before colectomy                                        |  | 7.1 (21/296)       | 0.2 (1/557)  | 20.0 (9/45)     | 1.5 (2/136) | 4.7 (4/85)                              | 0.0 (0/178) |
| Admitted ≥ 8 days before colectomy                                        |  | 4.5 (34/760)       | 1.8 (7/381)  | 2.2 (2/91)      | 1.5 (1/65)  | 3.7 (6/162)                             | 2.3 (3/133) |
| Medical treatment within one year before colectomy                        |  |                    |              |                 |             |                                         |             |
| TNF- $\alpha$ or cyclosporine                                             |  | 0 (0/67)           | 0 (0/64)     | 0 (0/12)        | 0 (0/10)    | 0 (0/23)                                | 0 (0/37)    |
| Reoperation within 30 days postoperatively                                |  | 8.8 (9/102)        | 4.1 (3/73)   | 18.1 (2/11)     | 4.8 (1/21)  | 7.4 (2/27)                              | 0 (0/21)    |
| Charlson Comorbidity Index score:                                         |  |                    |              |                 |             |                                         |             |
| 0                                                                         |  | 2.2 (18/810)       | 0.6 (4/705)  | 3.1 (3/96)      | 0.0 (0/146) | 2.1 (4/191)                             | 0.9 (2/224) |
| 1-2                                                                       |  | 12.9 (25/194)      | 1.6 (3/194)  | 20.0 (6/30)     | 4.4 (2/45)  | 6.1 (3/49)                              | 1.4 (1/69)  |
| ≥3                                                                        |  | 23.1 (12/52)       | 2.6 (1/39)   | 20.0 (2/10)     | 10 (1/10)   | 42.9 (3/7)                              | 0 (0/18)    |
| Colectomy type                                                            |  |                    |              |                 |             |                                         |             |
| Colectomy with ileorectal anastomosis                                     |  | KJFH00 - 01        | 15.8 (6/38)  | 0 (0/54)        | 6.3 (1/16)  | 0 (0/42)                                | 0 (0/39)    |
| Colectomy with ileostomy                                                  |  | KJFH10 - 11        | 4.9 (43/875) | 1.5 (8/523)     | 9.3 (9/97)  | 3.0 (3/99)                              | 4.6 (9/196) |
| Proctocolectomy with ileostomy                                            |  | KJFH20 - 21        | 5.5 (4/73)   | 0 (0/147)       | 0 (0/8)     | 0 (0/49)                                | 0 (0/65)    |
| Restorative proctocolectomy ± ileostomy                                   |  | KJFH30 - 33        | 6.5 (2/31)   | 0 (0/197)       | 0 (0/2)     | 0 (0/5)                                 | 0 (0/4)     |
| Proctocolectomy with Koch reservoir                                       |  | KJFH40             | 0 (0/1)      | 0 (0/1)         | 0 (0/0)     | 0 (0/0)                                 | 0 (0/0)     |
| Other form of colectomy                                                   |  | KJFH96             | 0 (0/38)     | 0 (0/16)        | 7.7 (1/13)  | 0 (0/6)                                 | 14.3 (1/7)  |
| Time period                                                               |  |                    |              |                 |             |                                         |             |
| 1996-2000                                                                 |  | 5.9 (22/371)       | 0.3 (1/307)  | 7.4 (4/54)      | 1.5 (1/67)  | 1.1 (1/90)                              | 0.9 (1/114) |
| 2001-2005                                                                 |  | 5.2 (20/385)       | 0.3 (1/343)  | 2.8 (1/36)      | 2.6 (2/78)  | 6.0 (5/84)                              | 1.1 (1/95)  |
| 2005-2010                                                                 |  | 4.3 (13/300)       | 2.1 (6/288)  | 13.0 (6/46)     | 0 (0/56)    | 5.5 (4/73)                              | 1.0 (1/102) |

\* Patients for who codes for both ulcerative colitis and Crohn's disease were used at any preceding or subsequent admission or hospital contact.

44

45

46

47

48

49

1  
2  
3  
4

Table 4. Mortality rate ratios in patients with ulcerative colitis undergoing total colectomy in the period 1996-2010 in Denmark.

|                                                                           |                                    | Emergency    |              | Elective     |              |
|---------------------------------------------------------------------------|------------------------------------|--------------|--------------|--------------|--------------|
|                                                                           |                                    | Crude        | Adj*         | Crude        | Adj*         |
| Females                                                                   |                                    | Ref.         | Ref.         | Ref.         | Ref.         |
| Males                                                                     |                                    | <b>1.15</b>  | <b>1.16</b>  | <b>0.94</b>  | <b>0.79</b>  |
|                                                                           |                                    | (0.68-1.97)  | (0.68-1.98)  | (0.23-3.74)  | (0.20-3.19)  |
| Age at operation:                                                         |                                    |              |              |              |              |
|                                                                           | 0-39 years                         | Ref.         | Ref.         | Ref.         | Ref.         |
|                                                                           | ≥ 40 years                         | <b>26.18</b> | <b>17.78</b> | <b>24.65</b> | <b>24.51</b> |
|                                                                           |                                    | (11.2-61.1)  | (7.3-43.1)   | (3.0-200)    | (2.81-213.8) |
| Number of annual colectomies for IBD performed by the surgical department |                                    |              |              |              |              |
|                                                                           | ≤ 3/year                           | Ref.         | Ref.         | Ref.         | Ref.         |
|                                                                           | 3-12/year                          | <b>0.51</b>  | <b>0.58</b>  | <b>1.18</b>  | <b>1.51</b>  |
|                                                                           |                                    | (0.24-1.06)  | (0.28-1.23)  | (0.20-7.08)  | (0.25-9.18)  |
|                                                                           | >12/year                           | <b>0.30</b>  | <b>0.46</b>  | <b>0.30</b>  | <b>0.63</b>  |
|                                                                           |                                    | (0.17-0.55)  | (0.25-0.84)  | (0.05-1.82)  | (0.10-3.89)  |
| Duration of hospitalization before colectomy                              |                                    |              |              |              |              |
|                                                                           | Admitted < 8 days before colectomy | Ref.         | Ref.         | Ref.         | Ref.         |
|                                                                           | Admitted ≥ 8 days before colectomy | <b>0.62</b>  | <b>0.67</b>  | <b>10.30</b> | <b>10.26</b> |
|                                                                           |                                    | (0.36-1.06)  | (0.39-1.16)  | (1.27-83.6)  | (1.25-84.2)  |
| Charlson Comorbidity Index score:                                         |                                    |              |              |              |              |
|                                                                           | 0                                  | Ref.         | Ref.         | Ref.         | Ref.         |
|                                                                           | ≥1                                 | <b>7.20</b>  | <b>2.56</b>  | <b>3.05</b>  | <b>1.06</b>  |
|                                                                           |                                    | (4.10-12.65) | (1.42-4.61)  | (0.76-12.2)  | (0.25-4.46)  |
| Time period                                                               |                                    |              |              |              |              |
|                                                                           | 1996-2000                          | Ref.         | Ref.         | Ref.         | Ref.         |
|                                                                           | 2001-2005                          | <b>0.87</b>  | <b>0.90</b>  | <b>0.90</b>  | <b>0.90</b>  |
|                                                                           |                                    | (0.48-1.60)  | (0.49-1.64)  | (0.06-14.31) | (0.06-14.54) |
|                                                                           | 2005-2010                          | <b>0.72</b>  | <b>0.60</b>  | <b>6.47</b>  | <b>5.18</b>  |
|                                                                           |                                    | (0.36-1.43)  | (0.30-1.20)  | (0.78-53.7)  | (0.62-43.6)  |

\*Adj: Adjusted for age, gender and comorbidity.

37  
38  
39  
40  
41  
42  
43  
44  
45  
46  
47  
48  
49

## Reference List

- 1  
2  
3  
4  
5  
6  
7  
8  
9  
10  
11  
12  
13  
14  
15  
16  
17  
18  
19  
20  
21  
22  
23  
24  
25  
26  
27  
28  
29  
30  
31  
32  
33  
34  
35  
36  
37  
38  
39  
40  
41  
42  
43  
44  
45  
46  
47  
48  
49  
50  
51  
52  
53  
54  
55  
56  
57  
58  
59  
60
- (1) Andersson P, Olaison G, Bodemar G *et al.* Surgery for Crohn colitis over a twenty-eight-year period: fewer stomas and the replacement of total colectomy by segmental resection. *Scand J Gastroenterol* 2002;**37**(1):68-73.
- (2) Cosnes J, Nion-Larmurier I, Beaugerie L *et al.* Impact of the increasing use of immunosuppressants in Crohn's disease on the need for intestinal surgery. *Gut* 2005;**54**(2):237-41.
- (3) Actis GC, Pellicano R, Pinna-Pintor M *et al.* Rescue with infliximab and surgical outcomes for refractory ulcerative colitis. *J Am Coll Surg* 2007;**205**(4):e3-e4.
- (4) Hanauer SB, Feagan BG, Lichtenstein GR *et al.* Maintenance infliximab for Crohn's disease: the ACCENT I randomised trial. *Lancet* 2002;**359**(9317):1541-9.
- (5) Jakobovits SL, Jewell DP, Travis SP. Infliximab for the treatment of ulcerative colitis: outcomes in Oxford from 2000 to 2006. *Aliment Pharmacol Ther* 2007;**25**(9):1055-60.
- (6) Järnerot G, Hertervig E, Friis-Liby I *et al.* Infliximab as rescue therapy in severe to moderately severe ulcerative colitis: a randomized, placebo-controlled study. *Gastroenterology* 2005;**128**(7):1805-11.
- (7) Rutgeerts P, Sandborn WJ, Feagan BG *et al.* Infliximab for induction and maintenance therapy for ulcerative colitis. *N Engl J Med* 2005;**353**(23):2462-76.
- (8) Bernell O, Lapidus A, Hellers G. Risk factors for surgery and recurrence in 907 patients with primary ileocaecal Crohn's disease. *Br J Surg* 2000;**87**(12):1697-701.
- (9) Langholz E, Munkholm P, Davidsen M *et al.* Course of ulcerative colitis: analysis of changes in disease activity over years. *Gastroenterology* 1994;**107**(1):3-11.
- (10) Sandborn WJ, Rutgeerts P, Feagan BG *et al.* Colectomy rate comparison after treatment of ulcerative colitis with placebo or infliximab. *Gastroenterology* 2009;**137**(4):1250-60.
- (11) Taxonera C, Rodrigo L, Casellas F *et al.* Infliximab maintenance therapy is associated with decreases in direct resource use in patients with luminal or fistulizing Crohn's disease. *J Clin Gastroenterol* 2009;**43**(10):950-6.
- (12) Ramadas AV, Gunesh S, Thomas GA *et al.* Natural history of Crohn's disease in a population-based cohort from Cardiff (1986-2003): a study of changes in medical treatment and surgical resection rates. *Gut* 2010;**59**(9):1200-6.
- (13) Lazarev M, Ullman T, Schraut WH *et al.* Small bowel resection rates in Crohn's disease and the indication for surgery over time: experience from a large tertiary care center. *Inflamm Bowel Dis* 2010;**16**(5):830-5.
- (14) Turner D, Walsh CM, Steinhart AH *et al.* Response to corticosteroids in severe ulcerative colitis: a systematic review of the literature and a meta-regression. *Clin Gastroenterol Hepatol* 2007;**5**(1):103-10.

- 1  
2  
3  
4 (15) Aratari A, Papi C, Clemente V *et al.* Colectomy rate in acute severe ulcerative colitis in the  
5 infliximab era. *Dig Liver Dis* 2008;**40**(10):821-6.  
6  
7 (16) Gustavsson A, Halfvarson J, Magnuson A *et al.* Long-Term Colectomy Rate After Intensive  
8 Intravenous Corticosteroid Therapy for Ulcerative Colitis Prior to the Immunosuppressive  
9 Treatment Era. *Am J Gastroenterol* 2006.  
10  
11 (17) Goligher JC. Surgical treatment of ulcerative colitis. *Br Med J* 1961;**1**(5220):151-4.  
12  
13 (18) Lennard-Jones JE, VIVIAN AB. Fulminating ulcerative colitis. Recent experience in  
14 management. *Br Med J* 1960;**2**(5192):96-102.  
15  
16 (19) Goligher JC, Hoffman DC, De Dombal FT. Surgical treatment of severe attacks of  
17 ulcerative colitis, with special reference to the advantages of early operation. *Br Med J*  
18 1970;**4**(737):703-6.  
19  
20 (20) Alves A, Panis Y, Bouhnik Y *et al.* Subtotal colectomy for severe acute colitis: a 20-year  
21 experience of a tertiary care center with an aggressive and early surgical policy. *J Am Coll*  
22 *Surg* 2003;**197**(3):379-85.  
23  
24 (21) Roberts SE, Williams JG, Yeates D *et al.* Mortality in patients with and without colectomy  
25 admitted to hospital for ulcerative colitis and Crohn's disease: record linkage studies. *BMJ*  
26 2007;**335**(7628):1033.  
27  
28 (22) Kaplan G, McCarthy EP, Ayanian JZ *et al.* Impact of Hospital Volume on Postoperative  
29 Morbidity and Mortality Following a Colectomy for Ulcerative Colitis. *Gastroenterology*  
30 2008;**134**(3):680-7.  
31  
32 (23) Nicholls RJ, Clark DN, Kelso L *et al.* Nationwide linkage analysis in Scotland implicates  
33 age as the critical overall determinant of mortality in ulcerative colitis. *Aliment Pharmacol*  
34 *Ther* 2010;**31**(12):1310-21.  
35  
36 (24) Stenner JMC, White P, Gould SR. Audit of the management of severe ulcerative colitis in a  
37 DGH. *Gut* 2001;**48**(Suppl 1):A87.  
38  
39 (25) Andersen TF, Madsen M, Jørgensen J *et al.* The Danish National Hospital Register. A  
40 valuable source of data for modern health sciences. *Dan Med Bull* 1999;**46**(3):263-8.  
41  
42 (26) NOMESCO Classification of Surgical Procedures. 1-1-2010. Copenhagen.  
43  
44 (27) Frank L. Epidemiology. When an entire country is a cohort. *Science* 2000;**287**(5462):2398-  
45 9.  
46  
47 (28) Charlson ME, Pompei P, Ales KL *et al.* A new method of classifying prognostic  
48 comorbidity in longitudinal studies: development and validation. *J Chronic Dis*  
49 1987;**40**(5):373-83.  
50  
51 (29) Quan H, Sundararajan V, Halfon P *et al.* Coding algorithms for defining comorbidities in  
52 ICD-9-CM and ICD-10 administrative data. *Med Care* 2005;**43**(11):1130-9.  
53  
54  
55  
56  
57  
58  
59  
60



- 1  
2  
3  
4 (30) EDWARDS FC, Truelove SC. The course and prognosis of ulcerative colitis. *Gut*  
5 1963;**4**:299-315.  
6  
7 (31) Koudahl G, Kristensen M. Postoperative mortality and complications after colectomy for  
8 ulcerative colitis. *Scand J Gastroenterol Suppl* 1976;**37**:117-22.  
9  
10 (32) Frykholm G, Pahlman L, Enblad P *et al.* Early outcome after emergency and elective  
11 surgery for ulcerative colitis. *Acta Chir Scand* 1989;**155**(11-12):601-5.  
12  
13 (33) Carter FM, McLeod RS, Cohen Z. Subtotal colectomy for ulcerative colitis: complications  
14 related to the rectal remnant. *Dis Colon Rectum* 1991;**34**(11):1005-9.  
15  
16 (34) Hyman NH, Cataldo P, Osler T. Urgent subtotal colectomy for severe inflammatory bowel  
17 disease. *Dis Colon Rectum* 2005;**48**(1):70-3.  
18  
19 (35) Ananthakrishnan AN, McGinley EL, Binion DG. Does it matter where you are hospitalized  
20 for inflammatory bowel disease? A nationwide analysis of hospital volume. *Am J*  
21 *Gastroenterol* 2008;**103**(11):2789-98.  
22  
23 (36) Faiz O, Warusavitarne J, Bottle A *et al.* Nonelective excisional colorectal surgery in English  
24 National Health Service Trusts: a study of outcomes from Hospital Episode Statistics Data  
25 between 1996 and 2007. *J Am Coll Surg* 2010;**210**(4):390-401.  
26  
27 (37) Kurian A, Suryadevara S, Ramaraju D *et al.* In-hospital and 6-month mortality rates after  
28 open elective vs open emergent colectomy in patients older than 80 years. *Dis Colon Rectum*  
29 2011;**54**(4):467-71.  
30  
31 (38) Sonnenberg A. Age distribution of IBD hospitalization. *Inflamm Bowel Dis* 2010;**16**(3):452-  
32 7.  
33  
34 (39) Brooke BN. Cortisone and ulcerative colitis; and adverse effect. *Lancet*  
35 1956;**271**(6954):1175-7.  
36  
37 (40) Erichsen R, Sværke C, Tøttrup A. The coding quality of acute total colectomy in  
38 inflammatory bowel disease patients in a nationwide hospital registry.  
39 *Pharmacoepidemiology and Drug Safety* 2011;**20**(S1):S165.  
40  
41 (41) Thygesen SK, Christiansen CF, Christensen S *et al.* The predictive value of ICD-10  
42 diagnostic coding used to assess Charlson comorbidity index conditions in the population-  
43 based Danish National Registry of Patients. *BMC Med Res Methodol* 2011;**11**:83.  
44  
45  
46  
47  
48  
49  
50  
51  
52  
53  
54  
55  
56  
57  
58  
59  
60



1  
2  
3  
4 It is declared that each author contributed to

- 5 • conception and design, or analysis and interpretation of data
  - 6 • drafting the article or revising it critically for important intellectual content
  - 7 • and final approval of the version to be published.
- 8

9 Anders Tøttrup and Henrik Toft Sørensen are guarantors for the whole manuscript.

10

11  
12 Conflicts of interest: The authors declare no conflicts of interest.

13  
14  
15  
16  
17  
18  
19  
20  
21  
22  
23  
24  
25  
26  
27  
28  
29  
30  
31  
32  
33  
34  
35  
36  
37  
38  
39  
40  
41  
42  
43  
44  
45  
46  
47  
48  
49  
50  
51  
52  
53  
54  
55  
56  
57  
58  
59  
60

1  
2  
3  
4 **Appendix Table 1.** Codes used in this study from the Danish National Registry of  
5  
6 Patients.

7  
8  
9 International Classification of Diseases (ICD) codes:

10  
11 Inflammatory Bowel Disease:

12 ICD-8: 563.01 (Crohn's disease); 563.19+569.04 (Ulcerative colitis)

13  
14 ICD-10: K50 (Crohn's disease); K51 (Ulcerative colitis)

15  
16 Clostridium difficile infection

17  
18 ICD-10: A047

19  
20  
21  
22  
23  
24 Surgical procedure codes (NOMESCO) and treatment codes:

25  
26 Total colectomy:

27  
28 KJFH

29  
30 Reoperation:

31  
32 KJW

33  
34 TNF- $\alpha$  treatment and cyclosporine:

35  
36 BOHJ18A and BOHJ20  
37  
38  
39  
40  
41  
42  
43  
44  
45  
46  
47  
48  
49  
50  
51  
52  
53  
54  
55  
56  
57  
58  
59  
60

**Appendix Table 2.** Definition of diseases included in the Charlson Comorbidity Index (International Classification of Diseases (ICD) codes).

|    | <b>Disease</b>                         | <b>ICD-8 codes</b>                                                   | <b>ICD-10 codes</b>                                                            | <b>Score</b> |
|----|----------------------------------------|----------------------------------------------------------------------|--------------------------------------------------------------------------------|--------------|
| 1  | Myocardial infarction                  | 410                                                                  | I21;I22;I23                                                                    | 1            |
| 2  | Congestive heart failure               | 427.09; 427.10; 427.11;<br>427.19; 428.99; 782.49                    | I50; I11.0; I13.0; I13.2                                                       | 1            |
| 3  | Peripheral vascular disease            | 440; 441; 442; 443; 444; 445                                         | I70; I71; I72; I73; I74; I77                                                   | 1            |
| 4  | Cerebrovascular disease                | 430-438                                                              | I60-I69; G45; G46                                                              | 1            |
| 5  | Dementia                               | 290.09-290.19; 293.09                                                | F00-F03; F05.1; G30                                                            | 1            |
| 6  | Chronic pulmonary disease              | 490-493; 515-518                                                     | J40-J47; J60-J67; J68.4; J70.1;<br>J70.3; J84.1; J92.0; J96.1; J98.2;<br>J98.3 | 1            |
| 7  | Connective tissue disease              | 712; 716; 734; 446; 135.99                                           | M05; M06; M08;<br>M09;M30;M31;<br>M32; M33; M34; M35; M36;<br>D86              | 1            |
| 8  | Ulcer disease                          | 530.91; 530.98; 531-534                                              | K22.1; K25-K28                                                                 | 1            |
| 9  | Mild liver disease                     | 571 57301 57304                                                      | B18; K70.0-K70.3; K70.9; K71;<br>K73; K74; K76.0                               | 1            |
| 10 | Diabetes type 1<br><br>Diabetes type 2 | 249.00; 249.06; 249.07; 249.09<br><br>250.00; 250.06; 250.07; 250.09 | E10.0, E10.1; E10.9<br><br>E11.0; E11.1; E11.9                                 | 1            |

|    |                                                         |                                                            |                                                       |   |
|----|---------------------------------------------------------|------------------------------------------------------------|-------------------------------------------------------|---|
| 11 | Hemiplegia                                              | 344                                                        | G81; G82                                              | 2 |
| 12 | Moderate to severe renal disease                        | 403; 404; 580-583; 584; 590.09; 593.19; 753.10-753.19; 792 | I12; I13; N00-N05; N07; N11; N14; N17-N19; Q61        | 2 |
| 13 | Diabetes with end-organ damage:<br>- type 1<br>- type 2 | 249.01-249.05; 249.08<br>250.01-250.05; 250.08             | E10.2-E10.8<br>E11.2-E11.8                            | 2 |
| 14 | Any tumor                                               | 140-194                                                    | C00-C75                                               | 2 |
| 15 | Leukemia                                                | 204-207                                                    | C91-C95                                               | 2 |
| 16 | Lymphoma                                                | 200-203; 275.59                                            | C81-C85; C88; C90; C96                                | 2 |
| 17 | Moderate/severe liver disease                           | 57300 07000 07002 07004<br>07006 07008 4560                | B15.0; B16.0; B16.2; B19.0;<br>K70.4; K72; K76.6; I85 | 3 |
| 18 | Metastatic solid tumor                                  | 195-198; 199                                               | C76-C80 C78.7)                                        | 6 |
| 19 | AIDS                                                    | 079.83                                                     | B21-B24                                               | 6 |

1  
2  
3  
4  
5  
6  
7  
8  
9  
10  
11  
12  
13  
14  
15  
16  
17  
18  
19  
20  
21  
22  
23  
24  
25  
26  
27  
28  
29  
30  
31  
32  
33  
34  
35  
36  
37  
38  
39  
40  
41  
42  
43  
44  
45  
46  
47  
48  
49  
50  
51  
52  
53  
54  
55  
56  
57  
58  
59  
60

For peer review only



**Thirty-day mortality after elective and emergency total colectomy in Danish patients with inflammatory bowel disease:  
A population-based nationwide cohort study**

|                                 |                                                                                                                                                                                                                                                                                                                                                                                |
|---------------------------------|--------------------------------------------------------------------------------------------------------------------------------------------------------------------------------------------------------------------------------------------------------------------------------------------------------------------------------------------------------------------------------|
| Journal:                        | <i>BMJ Open</i>                                                                                                                                                                                                                                                                                                                                                                |
| Manuscript ID:                  | bmjopen-2012-000823.R1                                                                                                                                                                                                                                                                                                                                                         |
| Article Type:                   | Research                                                                                                                                                                                                                                                                                                                                                                       |
| Date Submitted by the Author:   | 01-Mar-2012                                                                                                                                                                                                                                                                                                                                                                    |
| Complete List of Authors:       | Tøttrup, Anders; Aarhus University Hospital, Surgery P<br>Erichsen, Rune; Aarhus University Hospital, Department of Clinical Epidemiology<br>Sværke, Claus; Aarhus University Hospital, Department of Clinical Epidemiology<br>Laurberg, Søren; Aarhus University Hospital, Surgery P<br>Toft Srensen, Henrik; Aarhus University Hospital, Department of Clinical Epidemiology |
| <b>Primary Subject Heading</b>: | Gastroenterology and hepatology                                                                                                                                                                                                                                                                                                                                                |
| Secondary Subject Heading:      | Surgery, Epidemiology                                                                                                                                                                                                                                                                                                                                                          |
| Keywords:                       | Inflammatory bowel disease < GASTROENTEROLOGY, Colorectal surgery < SURGERY, EPIDEMIOLOGY                                                                                                                                                                                                                                                                                      |
|                                 |                                                                                                                                                                                                                                                                                                                                                                                |

SCHOLARONE™  
Manuscripts

only

1  
2  
3  
4 **Thirty-day mortality after elective and emergency total colectomy in Danish**  
5 **patients with inflammatory bowel disease:**  
6 **A population-based nationwide cohort study**  
7

8  
9 A. Tøttrup<sup>1</sup>, R. Erichsen<sup>2</sup>, C. Sværke<sup>2</sup>, S. Laurberg<sup>1</sup>, H.T. Sørensen<sup>2</sup>.  
10

11  
12 <sup>1</sup>Department of Surgery P, Aarhus University Hospital  
13

14 <sup>2</sup>Department of Clinical Epidemiology, Aarhus University Hospital  
15  
16

17  
18 Corresponding author: Dr. Anders Tøttrup, Department of Surgery P, Aarhus University  
19 Hospital, Tage Hansensgade, 8000 Aarhus C, Denmark. Mail: [andtoe@rm.dk](mailto:andtoe@rm.dk). Phone: +45  
20  
21 89497703. Fax: +45 89497549  
22  
23  
24

25  
26  
27  
28  
29 Keywords: Crohn's disease; Colectomy; Inflammatory bowel disease; Mortality; Ulcerative  
30 colitis; surgery  
31  
32  
33  
34  
35  
36  
37  
38  
39  
40  
41  
42  
43  
44  
45  
46  
47  
48  
49  
50  
51  
52  
53  
54  
55  
56  
57  
58  
59  
60

## Abstract

### Objectives

The purpose of our investigation was to assess 30-day mortality among Danish IBD patients and to examine the prognostic impact of hospital total colectomy volume, age, gender, and comorbidity.

### Design

Cohort study.

### Setting

We compared 30-day survival over the 1996-2010 period among 2,889 IBD patients with total colectomy identified in the Danish National Registry of Patients. This registry covers all hospitals in Denmark. Postoperative survival patterns for patients with ulcerative colitis and Crohn's disease were compared, using proportional hazard regression. The regression model accounted for the timing of surgery, hospital total colectomy volume, age, gender, and comorbidity.

### Participants

Patients were enrolled in the study if they had a hospital registry diagnosis of IBD, with accompanying procedure codes for total colectomy. (See codes in Appendix Table 1). Hospitalizations were described as elective or emergency and patients were categorized as having Crohn's disease, ulcerative colitis, or as a mixed group.

### Outcome Measures

Primary outcome measure was 30-day mortality.



## Results

Among 2,889 IBD patients with total colectomy, 1439 (50%) underwent surgery during an emergency hospitalization. Thirty-day mortality was 5.3% (76/1439) among emergency cases, compared to 1% (14/1450) among elective cases. The highest mortality (8.1%; 11 out of 136) was observed among Crohn's patients undergoing emergency surgery. The mortality of patients with ulcerative colitis undergoing emergency surgery was 5.2% (55/1056). After elective surgery, the 30-day mortality was 0.9% (8/938) among patients with ulcerative colitis and 1.5% (3/201) among Crohn's disease patients. Low hospital total colectomy volume, comorbidity, and high age were associated with increased 30-day mortality in ulcerative colitis patients undergoing emergency surgery.

## Conclusion

Emergency total colectomy among patients with ulcerative colitis and particularly Crohn's disease is associated with substantial 30-day mortality.

## Significance of this study

### Article focus

- Elective and emergency total colectomy is commonly performed in inflammatory bowel disease
- Emergency operations are associated with higher mortality than elective procedures.

### Key messages

- IBD patients undergoing emergency total colectomy have a 30-day mortality of 5.3% as opposed to 1% after elective total colectomy.

1  
2  
3  
4  Low hospital volume, high age and comorbidity are associated with increased  
5  
6 mortality in patients with ulcerative colitis undergoing emergency surgery.  
7  
8

9  
10  It is suggested to centralize treatment, and to aim for elective procedures in  
11  
12 high risk patients.  
13

#### 14 15 16 Strengths and limitations of this study

17  
18  The study covers complete national data on total colectomies performed for  
19  
20 inflammatory disease.  
21  
22

23  
24  The unique ID number of all patients makes recording of all events highly  
25  
26 reliable.  
27  
28

29  
30  The main limitation is lack of access to specific clinical parameters  
31  
32  
33  
34  
35  
36  
37  
38  
39  
40  
41  
42  
43  
44  
45  
46  
47  
48  
49  
50  
51  
52  
53  
54  
55  
56  
57  
58  
59  
60

## Introduction

Inflammatory bowel diseases (IBD) cause serious morbidity and disability in people of all ages. Medical treatment remains the cornerstone for managing these diseases. Over the past two decades, use of immunosuppressants such as azathioprine (1;2) has increased significantly as a treatment modality. More recently, potent biological treatments have proved effective in treating both ulcerative colitis and Crohn's disease (3-7). Historical data have shown that up to 83% of patients with Crohn's disease underwent at least one bowel resection during a 10-year period (8), and up to 25% of patients with ulcerative colitis needed surgical treatment (9). While some recent studies show that modern medical treatment may decrease the need for surgery in IBD patients (10-12), others suggest that this is not the case (2;13).

In patients with severe ulcerative colitis, colectomy rates have remained stable over the past decades (14), although the introduction of biological rescue therapy is likely to decrease use of this surgical intervention in coming years (15;16). Mortality rates of up to 30% have been reported historically in patients undergoing emergency total colectomy for ulcerative colitis (17;18). Delay in patient referral for surgery has been proposed as the reason for high postoperative mortality (19). Although recent data from a highly specialized centre showed in-hospital mortality of less than 1% after emergency colectomy (20), population-based studies from the England (21) and the US (22) have reported postoperative mortality as high as 5.4% – 5.7% after emergency colectomy. This contrasts with rates as low as 0.7% – 0.8 % after elective colectomy. Advanced age, comorbidity, delay of more than 6 days between hospital admission and colectomy, and low hospital volume have been associated with increased postoperative mortality after colectomy in IBD patients (22;23).

1  
2  
3  
4 In many countries, including Denmark, increasing specialization has occurred, with  
5  
6 more rare and complicated conditions treated at specialized centres. Still, severe IBD  
7  
8 continues to be treated at general district hospitals, where the number of patients is low  
9  
10 and outcome appears to be poor (24).  
11

12  
13  
14 The present study aimed to investigate 30-day mortality after elective and emergency  
15  
16 total colectomy in Danish IBD patients, with special emphasis on the prognostic impact  
17  
18 of hospital total colectomy volume, age, sex, and comorbidity.  
19  
20  
21  
22  
23  
24  
25  
26  
27  
28  
29  
30  
31  
32  
33  
34  
35  
36  
37  
38  
39  
40  
41  
42  
43  
44  
45  
46  
47  
48  
49  
50  
51  
52  
53  
54  
55  
56  
57  
58  
59  
60

## Material and methods

We conducted this follow-up study in the setting of the entire Danish population of 5.4 million people during the January 1, 1996 – December 31, 2010 period. The Danish National Health Service provides tax-funded medical care for all Danish residents.

### Data sources

The Danish National Registry of Patients (DNRP) contains data on all non-psychiatric hospitalizations in Denmark since 1977 and on hospital outpatient clinics contacts since 1995 (25). The DNRP records civil registration number, hospital code, department code, date and type of admission (emergency/elective), dates and codes of procedures, admission and discharge dates, selected medical therapies, and up to 20 discharge diagnoses, coded by physicians according to the International Classification of Diseases (ICD), eighth revision until the end of 1993 and 10<sup>th</sup> revision thereafter. It is mandatory that all surgical procedures are coded according to the Nordic Medico-Statistical Committee (NOMESCO) classification (26).

We linked individual-level data from the DNRP using the civil registration number, a unique 10-digit identifier assigned at birth to all Danish residents by the Civil Registration System (CRS) (27). The CRS also tracks vital status and the residence of all Danish citizens and is updated daily.

### Patients with IBD and total colectomy

Patients were enrolled in the study if they had a hospital registry diagnosis of IBD, with accompanying procedure codes for total colectomy. (See codes in Appendix Table 1). Hospitalizations were described as elective or emergency and patients were categorized as having Crohn's disease, ulcerative colitis, or as a mixed group if their records

1  
2  
3  
4 contained ICD codes for both Crohn's disease and ulcerative colitis. We also obtained  
5  
6 information on reoperation occurring within 30 days of the primary surgery, TNF- $\alpha$ -  
7  
8 inhibitor and cyclosporine treatment in the year prior to surgery, and *Clostridium*  
9  
10 *difficile* infections. (See codes in Appendix Table 1). We categorised IBD patients  
11  
12 according to age at date of total colectomy (0-39, 40-59, and 60+ years), year of  
13  
14 colectomy (1996-2000, 2001-2005, and 2006-2010), and hospital total colectomy volume  
15  
16 defined as annual number of total colectomies performed on IBD patients by the surgical  
17  
18 department and categorised according to Kaplan et al (low: <3, medium: 3-12, high 12+)  
19  
20 (22)  
21  
22  
23  
24

25 We also extracted information from the DNRP on comorbidity, *i.e.*, diseases coexisting  
26  
27 with IBD. We summarized comorbidity status using the Charlson Comorbidity Index  
28  
29 (CCI) (28). The CCI's scoring system assigns between one and six points to a range of  
30  
31 diseases. Each patient's sum of points represents a measure of his or her comorbidity  
32  
33 burden. We placed our study patients into three groups according to their sum of points:  
34  
35 0 points ("no comorbidity"), 1 to 2 points ("low comorbidity"); and 3 or more points ("high  
36  
37 comorbidity") (28). We defined comorbid diseases according to the ICD-10 codes provided  
38  
39 by Quan *et al.* (29), matching ICD-8 codes to ICD-10 codes as closely as possible. (See  
40  
41 codes in Appendix Table 2).  
42  
43  
44

#### 45 **Mortality data**

46  
47 We followed IBD patients who were acutely or electively hospitalized for a procedure of  
48  
49 total colectomy in the period 1996-2010, from the date of colectomy until death, 30 days  
50  
51 post-surgery, or December 31, 2010, whichever came first.  
52  
53  
54

#### 55 **Statistical analysis**

1  
2  
3  
4 Our main outcome of interest was 30-day mortality, estimated as the number of deaths  
5 after total elective or emergency colectomy divided by the total number of IBD patients  
6 undergoing elective/emergency colectomy. We stratified our study sample by IBD type  
7  
8 and by the following covariates: gender, age at colectomy, year of colectomy, hospital  
9  
10 total colectomy volume (22), duration of hospitalization prior to surgery (< 8 days, ≥ 8  
11  
12 days), presence or absence of TNF- $\alpha$ -inhibitor or cyclosporine therapy in the year before  
13  
14 the total colectomy, reoperation, CCI score, and colectomy subtype. We calculated  
15  
16 differences in mortality and corresponding 95% confidence intervals (95% CI) between  
17  
18 patients undergoing emergency vs. elective surgery overall. We also calculated mortality  
19  
20 rates for ulcerative colitis patients by age and hospital total colectomy volume. In  
21  
22 addition, we used Cox proportional-hazards regression to estimate mortality rate ratios  
23  
24 (MRR) for each covariate, using the reference values shown in Table 4. MRRs were  
25  
26 adjusted for age (0-39, ≥ 40 years), gender, and CCI score (0 and ≥1 points) to evaluate  
27  
28 the independent prognostic effect of the covariates included in the model. (We lacked  
29  
30 statistical power to mutually adjust for all covariates). In a subsequent analysis, we  
31  
32 estimated the proportion of patients who underwent reoperation, as a secondary  
33  
34  
35  
36  
37  
38  
39  
40  
41  
42  
43  
44  
45  
46  
47  
48  
49  
50  
51  
52  
53  
54  
55  
56  
57  
58  
59  
60  
outcome.

## Results

### Descriptive data

In total, 2,889 IBD patients with total colectomy were identified from the DNRP for the January 1, 1996 - December 31, 2010 period. Of these, 1,439 (49.8%) underwent surgery during an emergency hospitalization (49% female). Characteristics of IBD patients by type of surgery (elective and emergency) are shown in Tables 1 and 2. The majority of patients had a total colectomy due to ulcerative colitis (64.7% for elective cases; 73.4% for emergency cases). Of the 1,450 elective cases (51.9% female), 718 (49.5%) were younger than 40 years, 438 (30.2%) were between ages 40 and 59, and the remaining 294 (20.3%) were  $\geq$  60 years old (Table 1). Of the 1,439 emergency cases 693 (48.2%) were younger than 40 years, 390 (27.1 %) were between ages 40 and 59, and the remaining 356 (24.7%) were  $\geq$  60 years old (Table 2). The majority of elective (69.9%) and emergency (65.1%) surgeries took place in high-volume hospitals with  $>12$  total colectomies/year (Tables 1 and 2). None of the patients included in the present study were coded for infection with *Clostridium difficile*.

Among all IBD patients, 1,075 (74.1%) of elective cases and 1,097 (76.2%) of emergency cases had a CCI score of 0, and 375 (25.9%) of elective cases and 342 (23.8%) of emergency cases had a score of 1 or higher. Comorbidity scores were distributed almost equally between the three IBD groups (Tables 1 and 2). Total colectomy with ileostomy was performed more often in emergency cases than in elective cases (81.2% vs. 54.6%). Proctocolectomy with ileostomy was carried out in 102 emergency cases (7.1%) and 261 elective cases (18%). Frequencies of procedures by type and disease groups are shown in Tables 1 and 2.

### Mortality



1  
2  
3  
4 Within 30 days following colectomy, 14 of the 1,450 patients who underwent elective  
5 surgery died (1.0%), while 76 of the 1,439 emergency patients (5.3%) died (mortality  
6 difference = 4.3%; 95% CI: 3.1%, - 5.6%). Among ulcerative colitis patients, mortality was  
7  
8 0.9% (8/938) in the elective group and 5.2% in the emergency group. Patients with  
9  
10 Crohn's disease undergoing emergency surgery had the highest 30-day mortality (11/136  
11  
12 = 8.1%).  
13  
14  
15

16  
17  
18 Mortality was low in ulcerative colitis patients aged under 40 (0.2%, Table 3), both for  
19  
20 elective and emergency surgery. For patients aged 60 years or older, mortality increased  
21  
22 to 3.3% for those undergoing colectomy on an elective basis and to 18.4% for those  
23  
24 undergoing this procedure on an emergency basis (mortality difference = 15.1%; 95% CI:  
25  
26 9.8%, 20.3%). Mortality was lowest in high-volume hospitals (0.5% for elective and 3.6%  
27  
28 for emergency cases [mortality difference = 3.1%; 95% CI: 1.6%, 4.6%], Table 3). Patients  
29  
30 with high CCI scores also had high mortality. Table 3 shows mortality according to  
31  
32 duration of hospitalization prior to colectomy, colectomy type, and time period. Numbers  
33  
34 of outcomes in patients with Crohn's disease or mixed Crohn's disease/ulcerative colitis  
35  
36 were too small to permit more detailed analysis of mortality.  
37  
38  
39

40  
41 In a subsequent analysis we found that reoperation within 30 days occurred in 115  
42  
43 (7.9%) elective cases and in 140 (9.7%) emergency cases and was associated with  
44  
45 particularly high mortality.  
46  
47  
48

#### 49 **Prognostic factors in patients with ulcerative colitis.**

50  
51 Crude and adjusted MRRs for patients with ulcerative colitis are shown in Table 4.  
52  
53 Higher age at operation ( $\geq 40$  years) was associated with major increases in MRRs in both  
54  
55 emergency and elective cases. A CCI score  $\geq 1$  was associated with an increased MRR  
56  
57  
58  
59  
60

1  
2  
3  
4 after emergency colectomy, but had no influence on MRR in patients undergoing elective  
5  
6 colectomy. MRRs were lower for cases undergoing surgery at high-volume hospitals  
7  
8 compared with low-volume hospitals. In the regression model for emergency colectomies,  
9  
10 gender, duration of hospitalization before colectomy, and time period were not clearly  
11  
12 associated with mortality. In the regression model for elective colectomies, hospitalization  
13  
14 for 8 days or more prior to surgery was associated with an increased MRR. Numbers  
15  
16 were too low to permit calculation of MRRs for patients with Crohn's disease or with both  
17  
18 ulcerative colitis and Crohn's disease.  
19  
20  
21  
22  
23  
24  
25  
26  
27  
28  
29  
30  
31  
32  
33  
34  
35  
36  
37  
38  
39  
40  
41  
42  
43  
44  
45  
46  
47  
48  
49  
50  
51  
52  
53  
54  
55  
56  
57  
58  
59  
60

## Discussion

Our study showed that 30-day postoperative mortality after total colectomy was 5.3% for IBD patients undergoing surgery on an emergency basis and 1 % for those with elective procedures. We also found that comorbidity, surgery in a hospital performing few annual colectomies, and age over 40 were associated with increased mortality after emergency total colectomy in patients with ulcerative colitis. Age over 40 and hospitalization for 8 days or more prior to colectomy were associated with increased mortality in ulcerative colitis patients undergoing elective total colectomy.

Our data extend previous research with recent population based data. Mortality after emergency total colectomy for ulcerative colitis was as high as 27% (19;30-32) in the past. More recent data from tertiary referral centres indicates in-hospital mortality of less than 0.6% (20;33;34). However, a short report on a small number of patients treated at a district general hospital in the UK raised concerns that mortality remains considerably higher than estimates based on tertiary centres (24). This was confirmed in a record linkage study conducted in England for the 1998-2000 period by Roberts *et al.* In that study, 30-day mortality was 0.8% following elective colectomy and 5.7% following emergency colectomy in ulcerative colitis patients (21). A later study by Kaplan *et al.*, based on the American Nationwide Inpatient Sample database, reported similar figures of 0.7% and 5.4% for in-hospital mortality following elective and emergency colectomy, respectively, in ulcerative colitis patients (22). This large-scale American study, covering approximately 20% of Veterans' Administration admissions, identified low hospital volume for colectomies, age over 40, comorbidity, and hospitalization for more than 7 days prior to colectomy as independent prognostic factors. Our study supports these previous population-based investigations, showing that 30-day postoperative mortality after total colectomy is probably not as low as suggested by reports from tertiary referral

1  
2  
3  
4 centres. In addition, both the American study and our study underscore that a high  
5  
6 volume of these surgeries – and consequently a high degree of experience – may be  
7  
8 important in reducing postoperative mortality after both emergency and elective total  
9  
10 colectomy in IBD patients (35).

11  
12  
13  
14 Our finding of 8.1% 30-day mortality after emergency surgery in Crohn's disease patients  
15  
16 contrasts with the Roberts *et al.* (21) study, which found a 30-day mortality of only 2.9%.  
17  
18 The main reason for this difference may be that we included only patients with total  
19  
20 colectomy, while Roberts *et al.* included patients undergoing all types of colectomy,  
21  
22 including right hemicolectomy. Regrettably, the number of patients in the Crohn group  
23  
24 was low precluding detailed statistical analysis of this cohort of patients. The group of  
25  
26 patients with both a diagnosis of ulcerative colitis and Crohn's disease was relatively  
27  
28 large, and we assume that it includes patients, whose diagnosis has indeed been re-  
29  
30 classified. It may also include patients, who at a single occasion has received an  
31  
32 incorrect diagnosis, because we expanded our search for diagnosis to a period beginning  
33  
34 in 1997 and continuing until conclusion of the study. In this respect, our study was  
35  
36 different to the previously population-based studies (21-23).

37  
38  
39  
40  
41 The high mortality observed in our study calls for a critical revision of indications for  
42  
43 elective and emergency colectomy in patients with Crohn's colitis. A key recommendation  
44  
45 is to treat patients with severe ulcerative colitis in highly specialized centres. Similar  
46  
47 recommendations could be made for patients with Crohn's disease, although the number  
48  
49 of patients included in the present study was too low to provide statistical support.

50  
51  
52  
53  
54 Our study also confirmed that older age, emergency procedures, and a high degree of  
55  
56 comorbidity are associated with increased mortality after intestinal surgery  
57  
58  
59  
60

1  
2  
3  
4 (22;23;36;37). In addition, it is known from population-based studies that hospitalization  
5  
6 for ulcerative colitis has a two-peak age incidence in a number of countries including  
7  
8 Denmark (38). We found that a high proportion of patients with ulcerative colitis  
9  
10 underwent total colectomy after age 60. An elective procedure performed earlier in life  
11  
12 would most likely reduce mortality in these patients. Interestingly, comorbidity had no  
13  
14 influence on MRRs among patients undergoing elective surgery. This suggests that  
15  
16 interventions to address comorbidities such as elevated blood pressure, arrhythmias,  
17  
18 and diabetes may have taken place preoperatively, ensuring a safer postoperative course.  
19  
20 It is not possible from the present result to speculate about the influence of surgical  
21  
22 procedure on mortality. First of all, the number of patients in the different subgroups is  
23  
24 fairly low precluding statistical subgroup analysis, and secondly, the preoperative  
25  
26 condition of the patients has probably had influence on the choice of surgical procedure.  
27  
28  
29  
30

31 When medical treatment cannot achieve remission, delaying surgery can increase  
32  
33 morbidity and mortality (19;39). Thus Kaplan *et al* (22) reported more than a doubling of  
34  
35 the MRR among patients who were hospitalized (and presumably treated medically) for  
36  
37 more than 7 days prior to surgery. Our study confirmed these findings for the subgroup  
38  
39 undergoing elective surgery.  
40  
41  
42

43 The main strength of the present study is its nationwide population-based design in the  
44  
45 setting of a free tax-supported healthcare system with complete information on follow-up.  
46  
47 Moreover, we used a validated approach to identify IBD patients undergoing surgery (40).  
48  
49 These features ensure generalizability of our results and minimize selection bias. In  
50  
51 addition, we were able to adjust for a number of important covariates, including  
52  
53 comorbidity, for which we had high-quality data (41).  
54  
55  
56  
57  
58  
59  
60

1  
2  
3  
4 Our study also had several limitations. Although we used a validated approach to  
5  
6 identify colectomized IBD patients, approximately 16% had codes corresponding to both  
7  
8 Crohn's disease and ulcerative colitis. As mentioned, this is most likely due to some  
9  
10 degree of coding error. We therefore grouped IBD patients with mixed codes separately to  
11  
12 minimize misclassification of the Crohn's and ulcerative colitis groups. We also did not  
13  
14 have access to important clinical parameters, such as reasons for deciding to proceed  
15  
16 with surgery or to discontinue medical treatment. Thus we were unable to investigate the  
17  
18 role of these important issues in relation to postoperative mortality. Finally, registration  
19  
20 of rescue therapy with cyclosporine or infliximab was probably incomplete, because such  
21  
22 registration has only recently become compulsory in our country.  
23

24  
25  
26  
27 In conclusion, we observed high 30-day mortality among IBD patients undergoing  
28  
29 emergency total colectomy. Among patients with ulcerative colitis, 30-day mortality was  
30  
31 5.2% after total emergency colectomy, and among patients with Crohn's disease, it was  
32  
33 8.1%. Low hospital volume of colectomy, comorbidity, and age over 40 were important  
34  
35 prognostic factors.  
36  
37  
38  
39  
40  
41  
42  
43  
44  
45  
46  
47  
48  
49  
50  
51  
52  
53  
54  
55  
56  
57  
58  
59  
60

Table 1: Characteristics of patients with an inflammatory bowel disease (IBD) diagnosis undergoing elective total colectomy in the period 1996-2010 in Denmark.

|                                                                           |                                         | Ulcerative colitis | Crohn's disease | Ulcerative colitis and Crohn's disease* |              |
|---------------------------------------------------------------------------|-----------------------------------------|--------------------|-----------------|-----------------------------------------|--------------|
| Total number (n=1450)                                                     |                                         | 938 (64.7 %)       | 201 (13.9 %)    | 311 (21.4 %)                            |              |
| Males                                                                     |                                         | 485 (51.7%)        | 76 (37.8 %)     | 137 (44.1 %)                            |              |
| Females                                                                   |                                         | 453 (48.3 %)       | 125 (62.2 %)    | 174 (55.9 %)                            |              |
| Age at operation:                                                         |                                         |                    |                 |                                         |              |
|                                                                           | 0-39 years                              | 436 (46.5 %)       | 121 (60.2 %)    | 161 (51.8 %)                            |              |
|                                                                           | 40-59 years                             | 292 (31.1 %)       | 55 (27.4 %)     | 91 (29.3 %)                             |              |
|                                                                           | ≥ 60 years                              | 210 (22.4 %)       | 25 (12.4 %)     | 59 (19.0 %)                             |              |
| Number of annual colectomies for IBD performed in the surgical department |                                         |                    |                 |                                         |              |
|                                                                           | ≤3/year                                 | 131 (14.0 %)       | 22 (11.0 %)     | 45 (14.5 %)                             |              |
|                                                                           | 3-12/year                               | 166 (17.7 %)       | 28 (13.9 %)     | 44 (14.1 %)                             |              |
|                                                                           | >12/year                                | 641 (68.3 %)       | 151 (75.1 %)    | 222 (71.4%)                             |              |
| Duration of hospitalization before colectomy                              |                                         |                    |                 |                                         |              |
|                                                                           | Admitted < 8 days before colectomy      | 557 (59.4 %)       | 136 (67.7 %)    | 178 (57.2 %)                            |              |
|                                                                           | Admitted ≥ 8 days before colectomy      | 381 (40.6 %)       | 65 (32.3 %)     | 133 (42.8 %)                            |              |
| Medical treatment within one year before colectomy                        |                                         |                    |                 |                                         |              |
|                                                                           | TNF-α and Cyclosporine                  | 64 (6.8 %)         | 10 (5.0 %)      | 37 (11.9 %)                             |              |
| Reoperation within 30 days postoperatively                                |                                         | 73 (7.8 %)         | 21 (10.4 %)     | 21 (6.8 %)                              |              |
| Charlson Comorbidity Index Score                                          |                                         |                    |                 |                                         |              |
|                                                                           | 0                                       | 705 (75.2 %)       | 146 (72.6 %)    | 224 (72.0 %)                            |              |
|                                                                           | 1-2                                     | 194 (20.7 %)       | 45 (22.4 %)     | 69 (22.2 %)                             |              |
|                                                                           | ≥3                                      | 39 (4.2 %)         | 10 (5.0 %)      | 18 (5.8 %)                              |              |
| Colectomy type                                                            |                                         |                    |                 |                                         |              |
|                                                                           | Colectomy with ileorectal anastomosis   | KJFH00 - 01        | 54 (5.8 %)      | 42 (20.9 %)                             | 39 (12.5 %)  |
|                                                                           | Colectomy with ileostomy                | KJFH10 - 11        | 523 (55.8 %)    | 99 (49.3 %)                             | 170 (54.7 %) |
|                                                                           | Proctocolectomy with ileostomy          | KJFH20 - 21        | 147 (15.7 %)    | 49 (24.4 %)                             | 65 (20.9 %)  |
|                                                                           | Restorative proctocolectomy ± ileostomy | KJFH30 - 33        | 197 (21.0 %)    | 5 (2.5 %)                               | 28 (9.0 %)   |
|                                                                           | Proctocolectomy with Koch reservoir     | KJFH40             | 1 (0.1 %)       | 0 (0 %)                                 | 0 (0 %)      |
|                                                                           | Other form of colectomy                 | KJFH96             | 16 (1.7 %)      | 6 (3.0 %)                               | 9 (2.9 %)    |
| Time period                                                               |                                         |                    |                 |                                         |              |
|                                                                           | 1996-2000                               | 307 (32.7 %)       | 67 (33.3 %)     | 114 (36.7 %)                            |              |
|                                                                           | 2001-2005                               | 343 (36.6 %)       | 78 (38.8 %)     | 95 (30.6 %)                             |              |
|                                                                           | 2006-2010                               | 288 (30.7 %)       | 56 (27.9 %)     | 102 (32.8 %)                            |              |

\* Patients for who codes for both ulcerative colitis and Crohn's disease were used at any preceding or subsequent admission or hospital contact.

Table 2: Characteristics of patients with an inflammatory bowel disease (IBD) diagnosis undergoing emergency total colectomy in the period 1996-2010 in Denmark.

|                                                                           |                                             | Ulcerative colitis | Crohn's disease | Ulcerative colitis and Crohn's disease* |              |
|---------------------------------------------------------------------------|---------------------------------------------|--------------------|-----------------|-----------------------------------------|--------------|
| Total number (n=1,439)                                                    |                                             | 1056 (73.4 %)      | 136 (9.5 %)     | 247 (17.2%)                             |              |
| Males                                                                     |                                             | 559 (52.9 %)       | 62 (45.6 %)     | 113 (45.7 %)                            |              |
| Females                                                                   |                                             | 497 (47.1 %)       | 74 (54.4 %)     | 134 (54.3 %)                            |              |
| Age at operation:                                                         |                                             |                    |                 |                                         |              |
|                                                                           | 0-39 years                                  | 503 (47.6 %)       | 56 (41.2 %)     | 134 (54.3 %)                            |              |
|                                                                           | 40-59 years                                 | 286 (27.1 %)       | 39 (28.7 %)     | 65 (26.3 %)                             |              |
|                                                                           | ≥ 60 years                                  | 267 (25.3 %)       | 41 (30.1 %)     | 48 (19.4 %)                             |              |
| Number of annual colectomies for IBD performed in the surgical department |                                             |                    |                 |                                         |              |
|                                                                           | ≤3/year                                     | 168 (15.9 %)       | 31 (22.8 %)     | 43 (17.4 %)                             |              |
|                                                                           | 3-12/year                                   | 186 (17.6 %)       | 24 (17.6 %)     | 50 (20.2 %)                             |              |
|                                                                           | >12/year                                    | 702 (66.5 %)       | 81 (59.6 %)     | 154 (62.4%)                             |              |
| Duration of hospitalization before colectomy                              |                                             |                    |                 |                                         |              |
|                                                                           | Admitted < 8 days before colectomy          | 296 (28.0 %)       | 45 (33.1 %)     | 85 (34.4 %)                             |              |
|                                                                           | Admitted ≥ 8 days before colectomy          | 760 (72.0 %)       | 91 (66.9 %)     | 162 (65.6 %)                            |              |
| Medical treatment within one year before colectomy                        |                                             |                    |                 |                                         |              |
|                                                                           | TNF- $\alpha$ and cyclosporine              | 67 (6.3 %)         | 12 (8.8 %)      | 23 (9.3 %)                              |              |
| Reoperation within 30 days postoperatively                                |                                             | 102 (9.7 %)        | 11 (8.2 %)      | 27 (10.9 %)                             |              |
| Charlson Comorbidity Index score                                          |                                             |                    |                 |                                         |              |
|                                                                           | 0                                           | 810 (76.7 %)       | 96 (70.6 %)     | 191 (77.3 %)                            |              |
|                                                                           | 1-2                                         | 194 (18.4 %)       | 30 (22.1 %)     | 49 (19.8 %)                             |              |
|                                                                           | ≥3                                          | 52 (4.9 %)         | 10 (7.3 %)      | 7(2.8 %)                                |              |
| Colectomy type                                                            |                                             |                    |                 |                                         |              |
|                                                                           | Colectomy with ileorectal anastomosis       | KJFH00 - 01        | 38 (3.6 %)      | 16 (11.8 %)                             | 19 (7.7 %)   |
|                                                                           | Colectomy with ileostomy                    | KJFH10 - 11        | 875 (82.9 %)    | 97 (71.3 %)                             | 196 (74.4 %) |
|                                                                           | Proctocolectomy with ileostomy              | KJFH20 - 21        | 73 (6.9 %)      | 8 (5.9 %)                               | 21 (8.5 %)   |
|                                                                           | Restorative proctocolectomy $\pm$ ileostomy | KJFH30 - 33        | 31 (2.9 %)      | 2 (1.5 %)                               | 4 (1.6 %)    |
|                                                                           | Proctocolectomy with Koch reservoir         | KJFH40             | 1 (0.1 %)       | 0 (0 %)                                 | 0 (0 %)      |
|                                                                           | Other form of colectomy                     | KJFH96             | 38 (3.6 %)      | 13 (9.6 %)                              | 7 (2.8 %)    |
| Time period                                                               |                                             |                    |                 |                                         |              |
|                                                                           | 1996-2000                                   | 371 (35.1 %)       | 54 (39.7 %)     | 90 (36.4 %)                             |              |
|                                                                           | 2001-2005                                   | 385 (36.5 %)       | 36 (7.1 %)      | 84 (34.0 %)                             |              |
|                                                                           | 2006-2010                                   | 300 (28.4 %)       | 46 (11.0 %)     | 73 (30.0 %)                             |              |

\* Patients for who codes for both ulcerative colitis and Crohn's disease were used at any preceding or subsequent admission or hospital contact.



Table 3. Thirty-day mortality (in percent) in patients with an inflammatory bowel disease (IBD) diagnosis undergoing total colectomy in the period 1996-2010 in Denmark, by emergency vs. elective surgery.

|                                                                           |  | Ulcerative colitis |              | Crohn's disease |             | Ulcerative colitis and Crohn's disease* |             |
|---------------------------------------------------------------------------|--|--------------------|--------------|-----------------|-------------|-----------------------------------------|-------------|
|                                                                           |  | Emergency          | Elective     | Emergency       | Elective    | Emergency                               | Elective    |
| All                                                                       |  | 5.2 (55/1056)      | 0.9 (8/938)  | 8.1 (11/136)    | 1.5 (3/201) | 4.0 (10/247)                            | 1.0 (3/311) |
| Males                                                                     |  | 5.8 (31/559)       | 0.8 (4/485)  | 6.5 (4/62)      | 2.6 (2/76)  | 2.7 (3/113)                             | 0.7 (1/137) |
| Females                                                                   |  | 5.2 (24/497)       | 0.9 (4/453)  | 9.5 (7/74)      | 0.8 (1/125) | 5.2 (7/134)                             | 1.1 (2/174) |
| Age at operation:                                                         |  |                    |              |                 |             |                                         |             |
| 0-39 years                                                                |  | 0.2 (1/503)        | 0.2 (1/436)  | 0 (0/56)        | 0 (0/121)   | 0 (0/134)                               | 0 (0/161)   |
| 40-59 years                                                               |  | 1.7 (5/286)        | 0.0 (0/292)  | 5.1 (2/39)      | 0 (0/55)    | 3.1 (2/65)                              | 1.1 (1/91)  |
| ≥ 60 years                                                                |  | 18.4 (49/267)      | 3.3 (7/210)  | 22.0 (9/41)     | 12 (3/25)   | 16.7 (8/48)                             | 3.4 (2/59)  |
| Number of annual colectomies for IBD performed by the surgical department |  |                    |              |                 |             |                                         |             |
| ≤3/year                                                                   |  | 11.3 (19/168)      | 1.5 (2/131)  | 22.6 (7/31)     | 4.5 (1/22)  | 4.7 (2/43)                              | 0 (0/45)    |
| 3-12/year                                                                 |  | 5.9 (11/186)       | 1.8 (3/166)  | 8.3 (2/24)      | 0 (0/28)    | 4.0 (2/50)                              | 0 (0/44)    |
| >12/year                                                                  |  | 3.6 (25/702)       | 0.5 (3/641)  | 2.5 (2/81)      | 1.3 (2/151) | 3.9 (6/154)                             | 1.4 (3/222) |
| Duration of hospitalization before colectomy                              |  |                    |              |                 |             |                                         |             |
| Admitted < 8 days before colectomy                                        |  | 7.1 (21/296)       | 0.2 (1/557)  | 20.0 (9/45)     | 1.5 (2/136) | 4.7 (4/85)                              | 0.0 (0/178) |
| Admitted ≥ 8 days before colectomy                                        |  | 4.5 (34/760)       | 1.8 (7/381)  | 2.2 (2/91)      | 1.5 (1/65)  | 3.7 (6/162)                             | 2.3 (3/133) |
| Medical treatment within one year before colectomy                        |  |                    |              |                 |             |                                         |             |
| TNF- $\alpha$ or cyclosporine                                             |  | 0 (0/67)           | 0 (0/64)     | 0 (0/12)        | 0 (0/10)    | 0 (0/23)                                | 0 (0/37)    |
| Reoperation within 30 days postoperatively                                |  | 8.8 (9/102)        | 4.1 (3/73)   | 18.1 (2/11)     | 4.8 (1/21)  | 7.4 (2/27)                              | 0 (0/21)    |
| Charlson Comorbidity Index score:                                         |  |                    |              |                 |             |                                         |             |
| 0                                                                         |  | 2.2 (18/810)       | 0.6 (4/705)  | 3.1 (3/96)      | 0.0 (0/146) | 2.1 (4/191)                             | 0.9 (2/224) |
| 1-2                                                                       |  | 12.9 (25/194)      | 1.6 (3/194)  | 20.0 (6/30)     | 4.4 (2/45)  | 6.1 (3/49)                              | 1.4 (1/69)  |
| ≥3                                                                        |  | 23.1 (12/52)       | 2.6 (1/39)   | 20.0 (2/10)     | 10 (1/10)   | 42.9 (3/7)                              | 0 (0/18)    |
| Colectomy type                                                            |  |                    |              |                 |             |                                         |             |
| Colectomy with ileorectal anastomosis                                     |  | KJFH00 - 01        | 15.8 (6/38)  | 0 (0/54)        | 6.3 (1/16)  | 0 (0/42)                                | 0 (0/39)    |
| Colectomy with ileostomy                                                  |  | KJFH10 - 11        | 4.9 (43/875) | 1.5 (8/523)     | 9.3 (9/97)  | 3.0 (3/99)                              | 1.2 (2/170) |
| Proctocolectomy with ileostomy                                            |  | KJFH20 - 21        | 5.5 (4/73)   | 0 (0/147)       | 0 (0/8)     | 0 (0/49)                                | 0 (0/65)    |
| Restorative proctocolectomy ± ileostomy                                   |  | KJFH30 - 33        | 6.5 (2/31)   | 0 (0/197)       | 0 (0/2)     | 0 (0/5)                                 | 3.6 (1/28)  |
| Proctocolectomy with Koch reservoir                                       |  | KJFH40             | 0 (0/1)      | 0 (0/1)         | 0 (0/0)     | 0 (0/0)                                 | 0 (0/0)     |
| Other form of colectomy                                                   |  | KJFH96             | 0 (0/38)     | 0 (0/16)        | 7.7 (1/13)  | 0 (0/6)                                 | 14.3 (1/7)  |
| Time period                                                               |  |                    |              |                 |             |                                         |             |
| 1996-2000                                                                 |  | 5.9 (22/371)       | 0.3 (1/307)  | 7.4 (4/54)      | 1.5 (1/67)  | 1.1 (1/90)                              | 0.9 (1/114) |
| 2001-2005                                                                 |  | 5.2 (20/385)       | 0.3 (1/343)  | 2.8 (1/36)      | 2.6 (2/78)  | 6.0 (5/84)                              | 1.1 (1/95)  |
| 2005-2010                                                                 |  | 4.3 (13/300)       | 2.1 (6/288)  | 13.0 (6/46)     | 0 (0/56)    | 5.5 (4/73)                              | 1.0 (1/102) |

\* Patients for who codes for both ulcerative colitis and Crohn's disease were used at any preceding or subsequent admission or hospital contact.

1  
2  
3  
4

Table 4. Mortality rate ratios in patients with ulcerative colitis undergoing total colectomy in the period 1996-2010 in Denmark.

|                                                                           |                                    | Emergency    |              | Elective     |              |
|---------------------------------------------------------------------------|------------------------------------|--------------|--------------|--------------|--------------|
|                                                                           |                                    | Crude        | Adj*         | Crude        | Adj*         |
| Females                                                                   |                                    | Ref.         | Ref.         | Ref.         | Ref.         |
| Males                                                                     |                                    | <b>1.15</b>  | <b>1.16</b>  | <b>0.94</b>  | <b>0.79</b>  |
|                                                                           |                                    | (0.68-1.97)  | (0.68-1.98)  | (0.23-3.74)  | (0.20-3.19)  |
| Age at operation:                                                         |                                    |              |              |              |              |
|                                                                           | 0-39 years                         | Ref.         | Ref.         | Ref.         | Ref.         |
|                                                                           | ≥ 40 years                         | <b>26.18</b> | <b>17.78</b> | <b>24.65</b> | <b>24.51</b> |
|                                                                           |                                    | (11.2-61.1)  | (7.3-43.1)   | (3.0-200)    | (2.81-213.8) |
| Number of annual colectomies for IBD performed by the surgical department |                                    |              |              |              |              |
|                                                                           | ≤ 3/year                           | Ref.         | Ref.         | Ref.         | Ref.         |
|                                                                           | 3-12/year                          | <b>0.51</b>  | <b>0.58</b>  | <b>1.18</b>  | <b>1.51</b>  |
|                                                                           |                                    | (0.24-1.06)  | (0.28-1.23)  | (0.20-7.08)  | (0.25-9.18)  |
|                                                                           | >12/year                           | <b>0.30</b>  | <b>0.46</b>  | <b>0.30</b>  | <b>0.63</b>  |
|                                                                           |                                    | (0.17-0.55)  | (0.25-0.84)  | (0.05-1.82)  | (0.10-3.89)  |
| Duration of hospitalization before colectomy                              |                                    |              |              |              |              |
|                                                                           | Admitted < 8 days before colectomy | Ref.         | Ref.         | Ref.         | Ref.         |
|                                                                           | Admitted ≥ 8 days before colectomy | <b>0.62</b>  | <b>0.67</b>  | <b>10.30</b> | <b>10.26</b> |
|                                                                           |                                    | (0.36-1.06)  | (0.39-1.16)  | (1.27-83.6)  | (1.25-84.2)  |
| Charlson Comorbidity Index score:                                         |                                    |              |              |              |              |
|                                                                           | 0                                  | Ref.         | Ref.         | Ref.         | Ref.         |
|                                                                           | ≥1                                 | <b>7.20</b>  | <b>2.56</b>  | <b>3.05</b>  | <b>1.06</b>  |
|                                                                           |                                    | (4.10-12.65) | (1.42-4.61)  | (0.76-12.2)  | (0.25-4.46)  |
| Time period                                                               |                                    |              |              |              |              |
|                                                                           | 1996-2000                          | Ref.         | Ref.         | Ref.         | Ref.         |
|                                                                           | 2001-2005                          | <b>0.87</b>  | <b>0.90</b>  | <b>0.90</b>  | <b>0.90</b>  |
|                                                                           |                                    | (0.48-1.60)  | (0.49-1.64)  | (0.06-14.31) | (0.06-14.54) |
|                                                                           | 2005-2010                          | <b>0.72</b>  | <b>0.60</b>  | <b>6.47</b>  | <b>5.18</b>  |
|                                                                           |                                    | (0.36-1.43)  | (0.30-1.20)  | (0.78-53.7)  | (0.62-43.6)  |

\*Adj: Adjusted for age, gender and comorbidity.

37  
38  
39  
40  
41  
42  
43  
44  
45  
46  
47  
48  
49

## Reference List

- 1  
2  
3  
4  
5  
6  
7  
8  
9  
10  
11  
12  
13  
14  
15  
16  
17  
18  
19  
20  
21  
22  
23  
24  
25  
26  
27  
28  
29  
30  
31  
32  
33  
34  
35  
36  
37  
38  
39  
40  
41  
42  
43  
44  
45  
46  
47  
48  
49  
50  
51  
52  
53  
54  
55  
56  
57  
58  
59  
60
- (1) Andersson P, Olaison G, Bodemar G *et al.* Surgery for Crohn colitis over a twenty-eight-year period: fewer stomas and the replacement of total colectomy by segmental resection. *Scand J Gastroenterol* 2002;**37**(1):68-73.
- (2) Cosnes J, Nion-Larmurier I, Beaugerie L *et al.* Impact of the increasing use of immunosuppressants in Crohn's disease on the need for intestinal surgery. *Gut* 2005;**54**(2):237-41.
- (3) Actis GC, Pellicano R, Pinna-Pintor M *et al.* Rescue with infliximab and surgical outcomes for refractory ulcerative colitis. *J Am Coll Surg* 2007;**205**(4):e3-e4.
- (4) Hanauer SB, Feagan BG, Lichtenstein GR *et al.* Maintenance infliximab for Crohn's disease: the ACCENT I randomised trial. *Lancet* 2002;**359**(9317):1541-9.
- (5) Jakobovits SL, Jewell DP, Travis SP. Infliximab for the treatment of ulcerative colitis: outcomes in Oxford from 2000 to 2006. *Aliment Pharmacol Ther* 2007;**25**(9):1055-60.
- (6) Järnerot G, Hertervig E, Friis-Liby I *et al.* Infliximab as rescue therapy in severe to moderately severe ulcerative colitis: a randomized, placebo-controlled study. *Gastroenterology* 2005;**128**(7):1805-11.
- (7) Rutgeerts P, Sandborn WJ, Feagan BG *et al.* Infliximab for induction and maintenance therapy for ulcerative colitis. *N Engl J Med* 2005;**353**(23):2462-76.
- (8) Bernell O, Lapidus A, Hellers G. Risk factors for surgery and recurrence in 907 patients with primary ileocaecal Crohn's disease. *Br J Surg* 2000;**87**(12):1697-701.
- (9) Langholz E, Munkholm P, Davidsen M *et al.* Course of ulcerative colitis: analysis of changes in disease activity over years. *Gastroenterology* 1994;**107**(1):3-11.
- (10) Sandborn WJ, Rutgeerts P, Feagan BG *et al.* Colectomy rate comparison after treatment of ulcerative colitis with placebo or infliximab. *Gastroenterology* 2009;**137**(4):1250-60.
- (11) Taxonera C, Rodrigo L, Casellas F *et al.* Infliximab maintenance therapy is associated with decreases in direct resource use in patients with luminal or fistulizing Crohn's disease. *J Clin Gastroenterol* 2009;**43**(10):950-6.
- (12) Ramadas AV, Gunesh S, Thomas GA *et al.* Natural history of Crohn's disease in a population-based cohort from Cardiff (1986-2003): a study of changes in medical treatment and surgical resection rates. *Gut* 2010;**59**(9):1200-6.
- (13) Lazarev M, Ullman T, Schraut WH *et al.* Small bowel resection rates in Crohn's disease and the indication for surgery over time: experience from a large tertiary care center. *Inflamm Bowel Dis* 2010;**16**(5):830-5.
- (14) Turner D, Walsh CM, Steinhart AH *et al.* Response to corticosteroids in severe ulcerative colitis: a systematic review of the literature and a meta-regression. *Clin Gastroenterol Hepatol* 2007;**5**(1):103-10.

- 1  
2  
3  
4 (15) Aratari A, Papi C, Clemente V *et al.* Colectomy rate in acute severe ulcerative colitis in the  
5 infliximab era. *Dig Liver Dis* 2008;**40**(10):821-6.  
6  
7 (16) Gustavsson A, Halfvarson J, Magnuson A *et al.* Long-Term Colectomy Rate After Intensive  
8 Intravenous Corticosteroid Therapy for Ulcerative Colitis Prior to the Immunosuppressive  
9 Treatment Era. *Am J Gastroenterol* 2006.  
10  
11 (17) Goligher JC. Surgical treatment of ulcerative colitis. *Br Med J* 1961;**1**(5220):151-4.  
12  
13 (18) Lennard-Jones JE, VIVIAN AB. Fulminating ulcerative colitis. Recent experience in  
14 management. *Br Med J* 1960;**2**(5192):96-102.  
15  
16 (19) Goligher JC, Hoffman DC, De Dombal FT. Surgical treatment of severe attacks of  
17 ulcerative colitis, with special reference to the advantages of early operation. *Br Med J*  
18 1970;**4**(737):703-6.  
19  
20 (20) Alves A, Panis Y, Bouhnik Y *et al.* Subtotal colectomy for severe acute colitis: a 20-year  
21 experience of a tertiary care center with an aggressive and early surgical policy. *J Am Coll*  
22 *Surg* 2003;**197**(3):379-85.  
23  
24 (21) Roberts SE, Williams JG, Yeates D *et al.* Mortality in patients with and without colectomy  
25 admitted to hospital for ulcerative colitis and Crohn's disease: record linkage studies. *BMJ*  
26 2007;**335**(7628):1033.  
27  
28 (22) Kaplan G, McCarthy EP, Ayanian JZ *et al.* Impact of Hospital Volume on Postoperative  
29 Morbidity and Mortality Following a Colectomy for Ulcerative Colitis. *Gastroenterology*  
30 2008;**134**(3):680-7.  
31  
32 (23) Nicholls RJ, Clark DN, Kelso L *et al.* Nationwide linkage analysis in Scotland implicates  
33 age as the critical overall determinant of mortality in ulcerative colitis. *Aliment Pharmacol*  
34 *Ther* 2010;**31**(12):1310-21.  
35  
36 (24) Stenner JMC, White P, Gould SR. Audit of the management of severe ulcerative colitis in a  
37 DGH. *Gut* 2001;**48**(Suppl 1):A87.  
38  
39 (25) Andersen TF, Madsen M, Jørgensen J *et al.* The Danish National Hospital Register. A  
40 valuable source of data for modern health sciences. *Dan Med Bull* 1999;**46**(3):263-8.  
41  
42 (26) NOMESCO Classification of Surgical Procedures. 1-1-2010. Copenhagen.  
43 Ref Type: Serial (Book,Monograph)  
44  
45 (27) Frank L. Epidemiology. When an entire country is a cohort. *Science* 2000;**287**(5462):2398-  
46 9.  
47  
48 (28) Charlson ME, Pompei P, Ales KL *et al.* A new method of classifying prognostic  
49 comorbidity in longitudinal studies: development and validation. *J Chronic Dis*  
50 1987;**40**(5):373-83.  
51  
52 (29) Quan H, Sundararajan V, Halfon P *et al.* Coding algorithms for defining comorbidities in  
53 ICD-9-CM and ICD-10 administrative data. *Med Care* 2005;**43**(11):1130-9.  
54  
55  
56  
57  
58  
59  
60

- 1  
2  
3  
4 (30) EDWARDS FC, Truelove SC. The course and prognosis of ulcerative colitis. *Gut*  
5 1963;**4**:299-315.  
6  
7 (31) Koudahl G, Kristensen M. Postoperative mortality and complications after colectomy for  
8 ulcerative colitis. *Scand J Gastroenterol Suppl* 1976;**37**:117-22.  
9  
10 (32) Frykholm G, Pahlman L, Enblad P *et al*. Early outcome after emergency and elective  
11 surgery for ulcerative colitis. *Acta Chir Scand* 1989;**155**(11-12):601-5.  
12  
13 (33) Carter FM, McLeod RS, Cohen Z. Subtotal colectomy for ulcerative colitis: complications  
14 related to the rectal remnant. *Dis Colon Rectum* 1991;**34**(11):1005-9.  
15  
16 (34) Hyman NH, Cataldo P, Osler T. Urgent subtotal colectomy for severe inflammatory bowel  
17 disease. *Dis Colon Rectum* 2005;**48**(1):70-3.  
18  
19 (35) Ananthakrishnan AN, McGinley EL, Binion DG. Does it matter where you are hospitalized  
20 for inflammatory bowel disease? A nationwide analysis of hospital volume. *Am J*  
21 *Gastroenterol* 2008;**103**(11):2789-98.  
22  
23 (36) Faiz O, Warusavitarn J, Bottle A *et al*. Nonelective excisional colorectal surgery in English  
24 National Health Service Trusts: a study of outcomes from Hospital Episode Statistics Data  
25 between 1996 and 2007. *J Am Coll Surg* 2010;**210**(4):390-401.  
26  
27 (37) Kurian A, Suryadevara S, Ramaraju D *et al*. In-hospital and 6-month mortality rates after  
28 open elective vs open emergent colectomy in patients older than 80 years. *Dis Colon Rectum*  
29 2011;**54**(4):467-71.  
30  
31 (38) Sonnenberg A. Age distribution of IBD hospitalization. *Inflamm Bowel Dis* 2010;**16**(3):452-  
32 7.  
33  
34 (39) Brooke BN. Cortisone and ulcerative colitis; and adverse effect. *Lancet*  
35 1956;**271**(6954):1175-7.  
36  
37 (40) Erichsen R, Sværke C, Tøttrup A. The coding quality of acute total colectomy in  
38 inflammatory bowel disease patients in a nationwide hospital registry.  
39 *Pharmacoepidemiology and Drug Safety* 2011;**20**(S1):S165.  
40  
41 (41) Thygesen SK, Christiansen CF, Christensen S *et al*. The predictive value of ICD-10  
42 diagnostic coding used to assess Charlson comorbidity index conditions in the population-  
43 based Danish National Registry of Patients. *BMC Med Res Methodol* 2011;**11**:83.  
44  
45  
46  
47  
48  
49  
50  
51  
52  
53  
54  
55  
56  
57  
58  
59  
60

1  
2  
3  
4 It is declared that each author contributed to

- 5 • conception and design, or analysis and interpretation of data
  - 6 • drafting the article or revising it critically for important intellectual content
  - 7 • and final approval of the version to be published.
- 8

9 Anders Tøttrup and Henrik Toft Sørensen are guarantors for the whole manuscript.

10

11  
12 Conflicts of interest: The authors declare no conflicts of interest.

13  
14  
15  
16  
17  
18  
19  
20  
21  
22  
23  
24  
25  
26  
27  
28  
29  
30  
31  
32  
33  
34  
35  
36  
37  
38  
39  
40  
41  
42  
43  
44  
45  
46  
47  
48  
49  
50  
51  
52  
53  
54  
55  
56  
57  
58  
59  
60

1  
2  
3  
4 **Appendix Table 1.** Codes used in this study from the Danish National Registry of  
5  
6 Patients.

7  
8  
9 International Classification of Diseases (ICD) codes:

10  
11 Inflammatory Bowel Disease:

12  
13 ICD-8: 563.01 (Crohn's disease); 563.19+569.04 (Ulcerative colitis)

14  
15 ICD-10: K50 (Crohn's disease); K51 (Ulcerative colitis)

16  
17 Clostridium difficile infection

18  
19 ICD-10: A047

20  
21  
22  
23  
24 Surgical procedure codes (NOMESCO) and treatment codes:

25  
26 Total colectomy:

27  
28 KJFH

29  
30 Reoperation:

31  
32 KJW

33  
34 TNF- $\alpha$  treatment and cyclosporine:

35  
36 BOHJ18A and BOHJ20  
37  
38  
39  
40  
41  
42  
43  
44  
45  
46  
47  
48  
49  
50  
51  
52  
53  
54  
55  
56  
57  
58  
59  
60

**Appendix Table 2.** Definition of diseases included in the Charlson Comorbidity Index  
(International Classification of Diseases (ICD) codes).

|    | <b>Disease</b>                         | <b>ICD-8 codes</b>                                                   | <b>ICD-10 codes</b>                                                            | <b>Score</b> |
|----|----------------------------------------|----------------------------------------------------------------------|--------------------------------------------------------------------------------|--------------|
| 1  | Myocardial infarction                  | 410                                                                  | I21;I22;I23                                                                    | 1            |
| 2  | Congestive heart failure               | 427.09; 427.10; 427.11;<br>427.19; 428.99; 782.49                    | I50; I11.0; I13.0; I13.2                                                       | 1            |
| 3  | Peripheral vascular disease            | 440; 441; 442; 443; 444; 445                                         | I70; I71; I72; I73; I74; I77                                                   | 1            |
| 4  | Cerebrovascular disease                | 430-438                                                              | I60-I69; G45; G46                                                              | 1            |
| 5  | Dementia                               | 290.09-290.19; 293.09                                                | F00-F03; F05.1; G30                                                            | 1            |
| 6  | Chronic pulmonary disease              | 490-493; 515-518                                                     | J40-J47; J60-J67; J68.4; J70.1;<br>J70.3; J84.1; J92.0; J96.1; J98.2;<br>J98.3 | 1            |
| 7  | Connective tissue disease              | 712; 716; 734; 446; 135.99                                           | M05; M06; M08;<br>M09;M30;M31;<br>M32; M33; M34; M35; M36;<br>D86              | 1            |
| 8  | Ulcer disease                          | 530.91; 530.98; 531-534                                              | K22.1; K25-K28                                                                 | 1            |
| 9  | Mild liver disease                     | 571 57301 57304                                                      | B18; K70.0-K70.3; K70.9; K71;<br>K73; K74; K76.0                               | 1            |
| 10 | Diabetes type 1<br><br>Diabetes type 2 | 249.00; 249.06; 249.07; 249.09<br><br>250.00; 250.06; 250.07; 250.09 | E10.0, E10.1; E10.9<br><br>E11.0; E11.1; E11.9                                 | 1            |



|    |                                                         |                                                            |                                                       |   |
|----|---------------------------------------------------------|------------------------------------------------------------|-------------------------------------------------------|---|
| 11 | Hemiplegia                                              | 344                                                        | G81; G82                                              | 2 |
| 12 | Moderate to severe renal disease                        | 403; 404; 580-583; 584; 590.09; 593.19; 753.10-753.19; 792 | I12; I13; N00-N05; N07; N11; N14; N17-N19; Q61        | 2 |
| 13 | Diabetes with end-organ damage:<br>- type 1<br>- type 2 | 249.01-249.05; 249.08<br>250.01-250.05; 250.08             | E10.2-E10.8<br>E11.2-E11.8                            | 2 |
| 14 | Any tumor                                               | 140-194                                                    | C00-C75                                               | 2 |
| 15 | Leukemia                                                | 204-207                                                    | C91-C95                                               | 2 |
| 16 | Lymphoma                                                | 200-203; 275.59                                            | C81-C85; C88; C90; C96                                | 2 |
| 17 | Moderate/severe liver disease                           | 57300 07000 07002 07004<br>07006 07008 4560                | B15.0; B16.0; B16.2; B19.0;<br>K70.4; K72; K76.6; I85 | 3 |
| 18 | Metastatic solid tumor                                  | 195-198; 199                                               | C76-C80 C78.7)                                        | 6 |
| 19 | AIDS                                                    | 079.83                                                     | B21-B24                                               | 6 |

1  
2  
3  
4  
5  
6  
7  
8  
9  
10  
11  
12  
13  
14  
15  
16  
17  
18  
19  
20  
21  
22  
23  
24  
25  
26  
27  
28  
29  
30  
31  
32  
33  
34  
35  
36  
37  
38  
39  
40  
41  
42  
43  
44  
45  
46  
47  
48  
49  
50  
51  
52  
53  
54  
55  
56  
57  
58  
59  
60

For peer review only
